# Supplementary material for: Precise molecular engineering for the preparation of pyridinium photosensitizers with efficient ROS generation and photothermal conversion
Source: Royal Society of Chemistry journal article supplement (doi:10.1039/d3cp05718f), 2024-01-01
Supplement: d3cp05718f1.pdf [file d3cp05718f1.pdf]

## Supporting information

### **Precise Molecular Engineering for the Preparation of Pyridinium Photosensitizers with Efficient ROS Generation and Photothermal Conversion**

Weidong Yin,<sup>a</sup> Jianqing Li,<sup>b</sup> Yucheng Ma,<sup>a</sup> Weiqiang Li,<sup>a</sup> Yanping Huo,<sup>a</sup> Zujin Zhao,<sup>\*b</sup> and Shaomin Ji<sup>\*a</sup>

Light Industry and Chemical Engineering College, Guangdong University of Technology,  
Guangzhou, Guangdong 510006, China.  
E-mail: smji@gdut.edu.cn

## Table of Contents

|                                                              |    |
|--------------------------------------------------------------|----|
| <b>1. General Information</b> .....                          | 3  |
| <b>2. Experimental Details</b> .....                         | 3  |
| <b>3. <sup>1</sup>H and <sup>13</sup>C NMR Spectra</b> ..... | 4  |
| <b>4. Photophysical Properties</b> .....                     | 16 |
| <b>5. AIE Properties</b> .....                               | 16 |
| <b>6. Solvation Effect</b> .....                             | 17 |
| <b>7. ROS Generation</b> .....                               | 17 |
| <b>8. Photothermal Conversion</b> .....                      | 20 |
| <b>9. Cell Imaging and Cell Viability</b> .....              | 21 |

## 1. General Information

Unless otherwise described, all reagents and solvents were purchased from commercial sources and used without further purification. All the samples were prepared according to the standard methods. For UV and fluorescence spectral data, each data was measured three times and the average value is taken.

## 2. Experimental Details

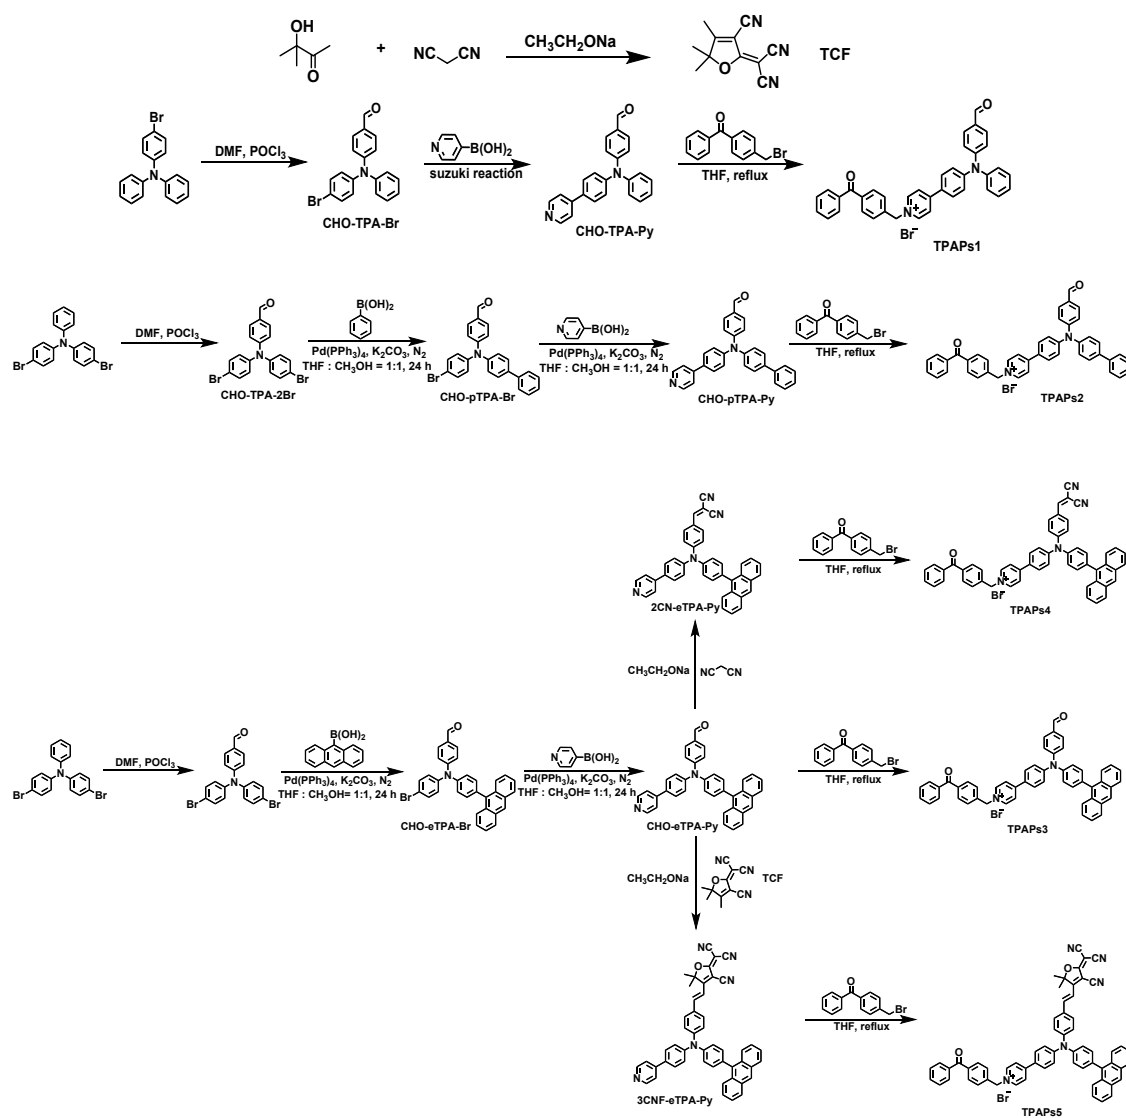

Scheme S1. Synthetic routes of TCF, TPAPs1, TPAPs2, TPAPs3, TPAPs4 and TPAPs5.

### 3. $^1\text{H}$ and $^{13}\text{C}$ NMR Spectra

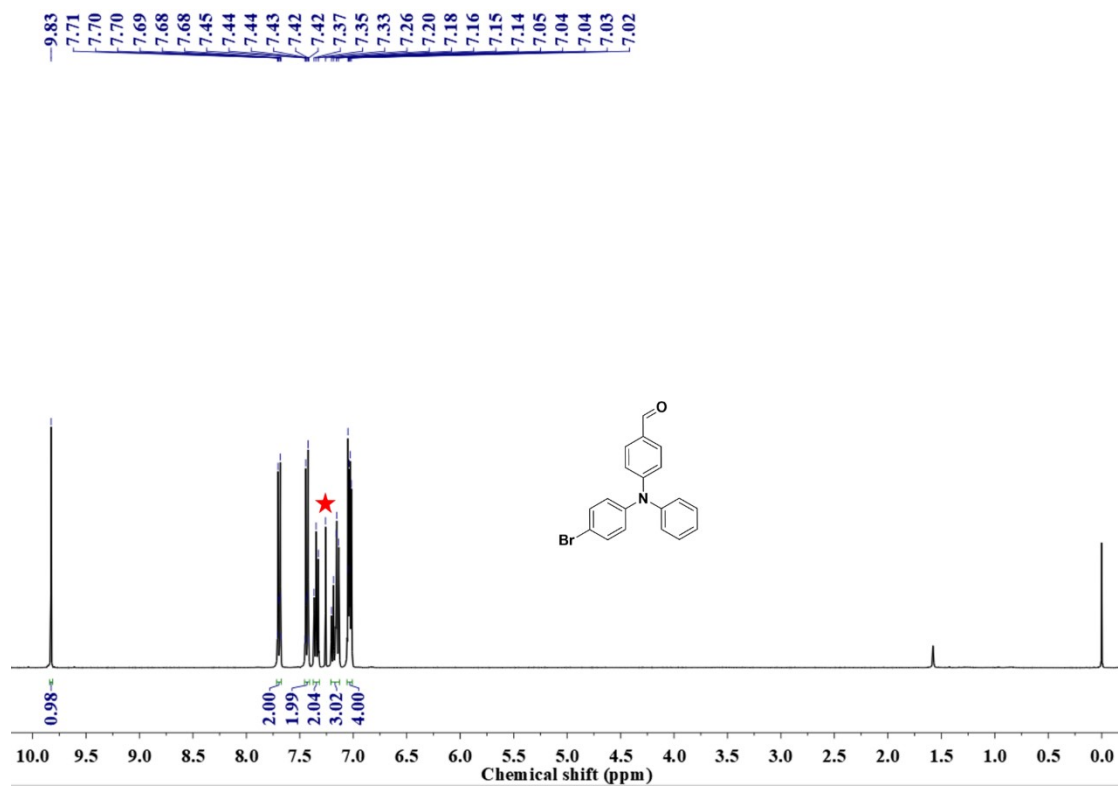

Figure S1.  $^1\text{H}$  NMR spectrum of CHO-TPA-Br in  $\text{CDCl}_3$ .

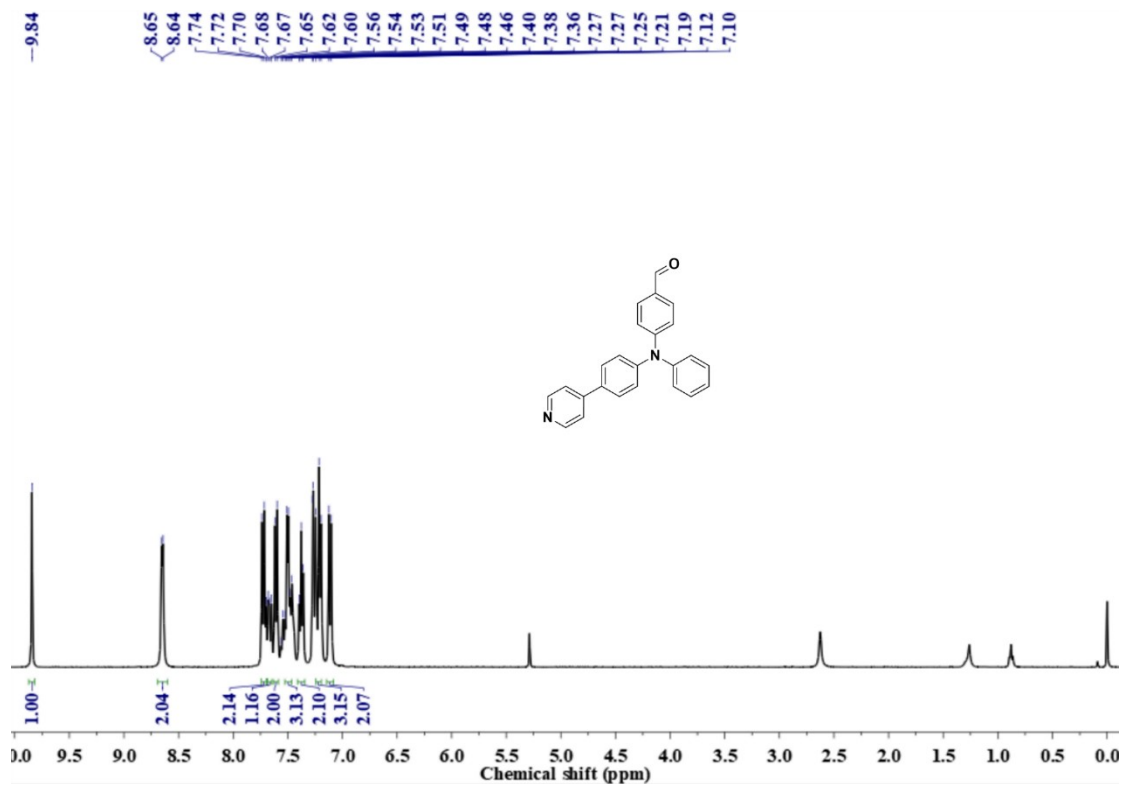

Figure S2.  $^1\text{H}$  NMR spectrum of CHO-TPA-Py in  $\text{CDCl}_3$ .

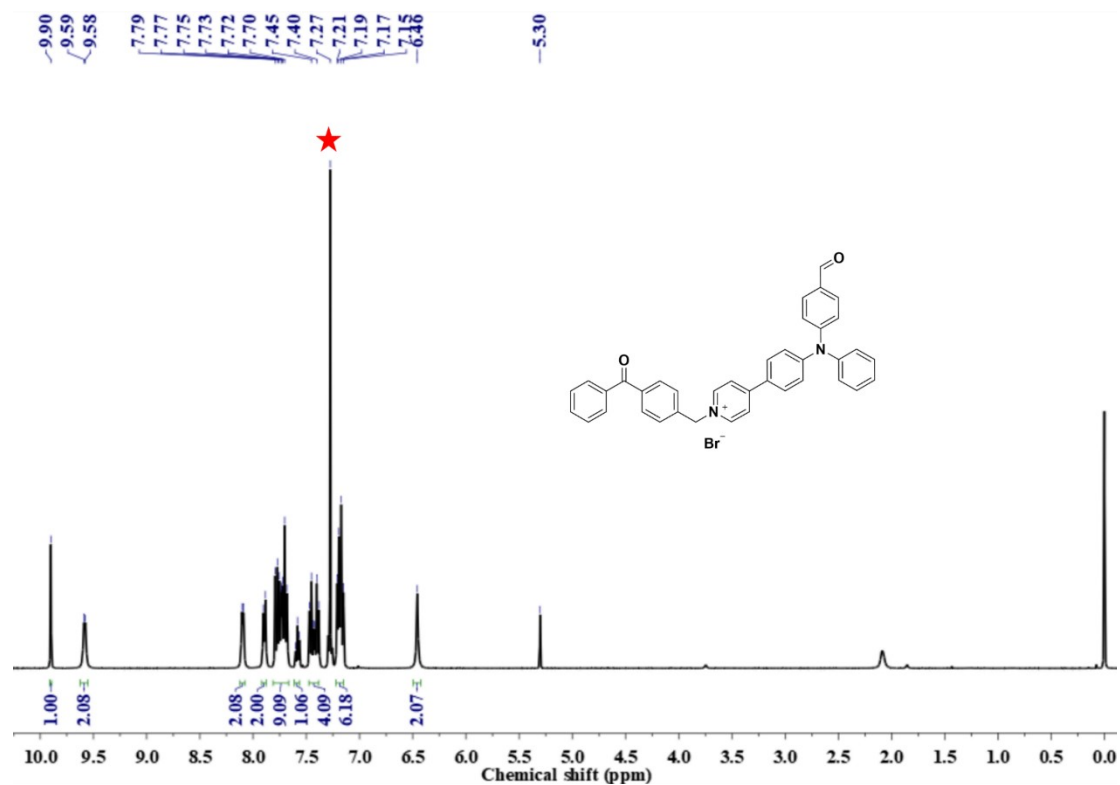

Figure S3.  $^1\text{H}$  NMR spectrum of TPAPs1 in  $\text{CDCl}_3$ .

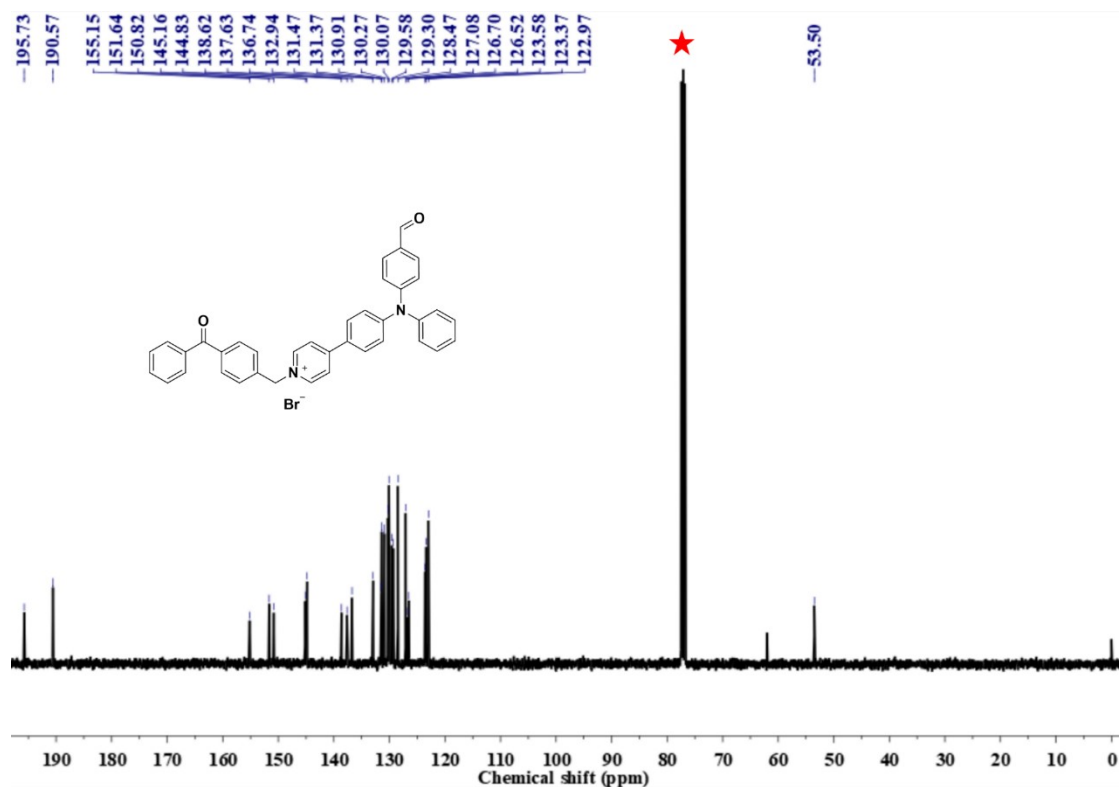

Figure S4.  $^{13}\text{C}$  NMR spectrum of TPAPs1 in  $\text{CDCl}_3$ .

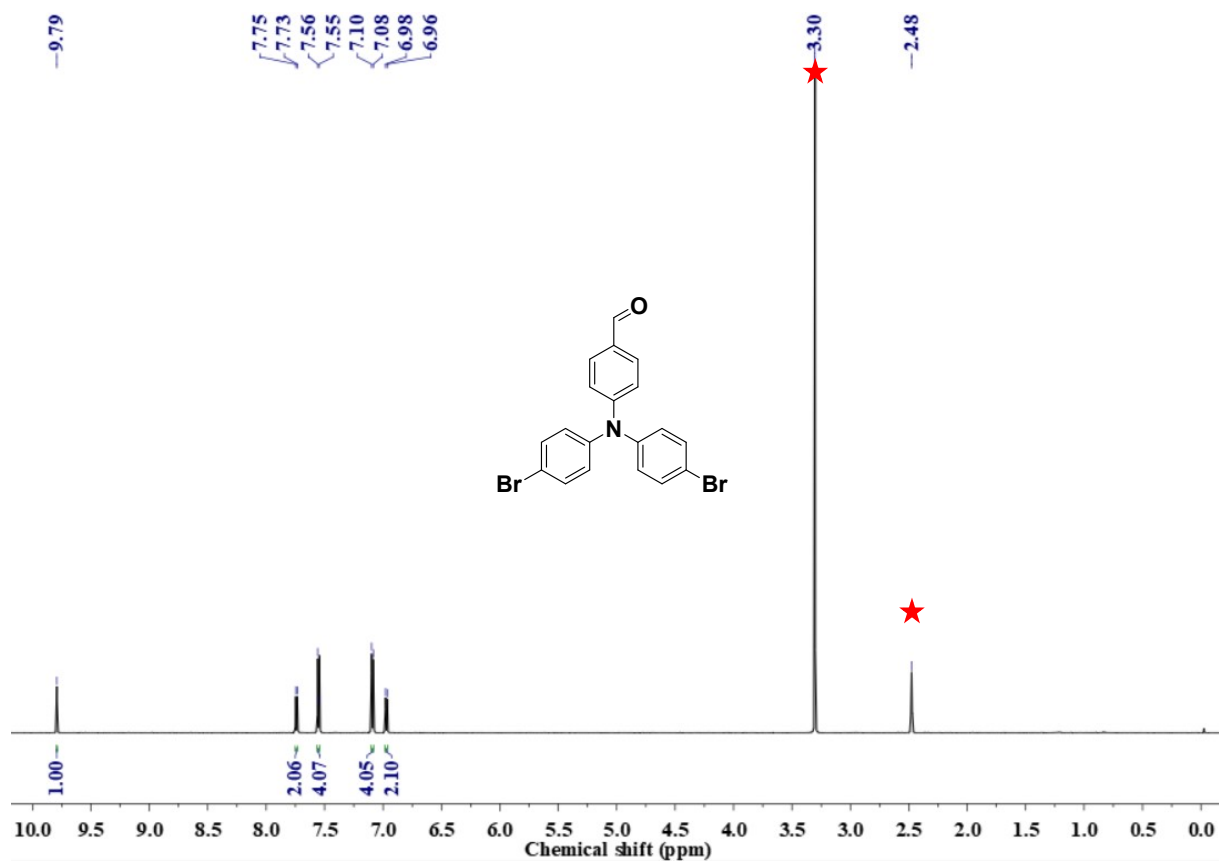

Figure S5.  $^1\text{H}$  NMR spectrum of CHO-TPA-2Br in  $\text{DMSO-}d_6$ .

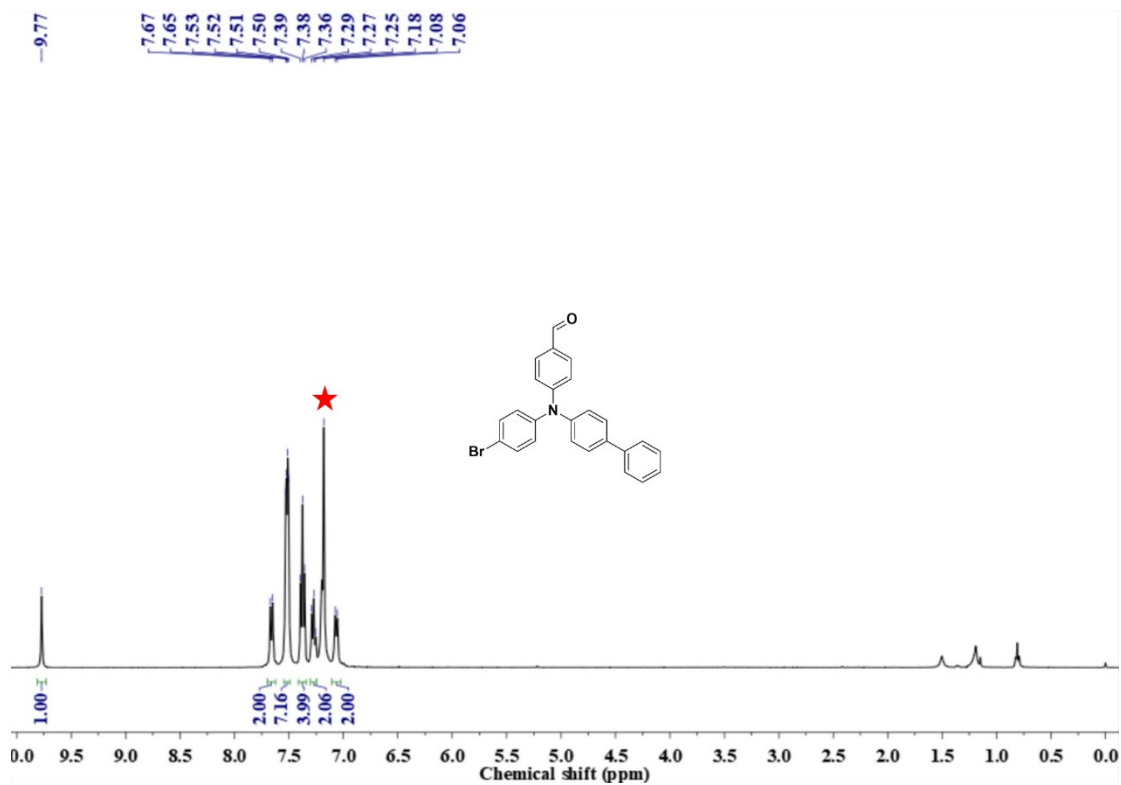

Figure S6.  $^1\text{H}$  NMR spectrum of CHO-pTPA-Br in  $\text{CDCl}_3$ .

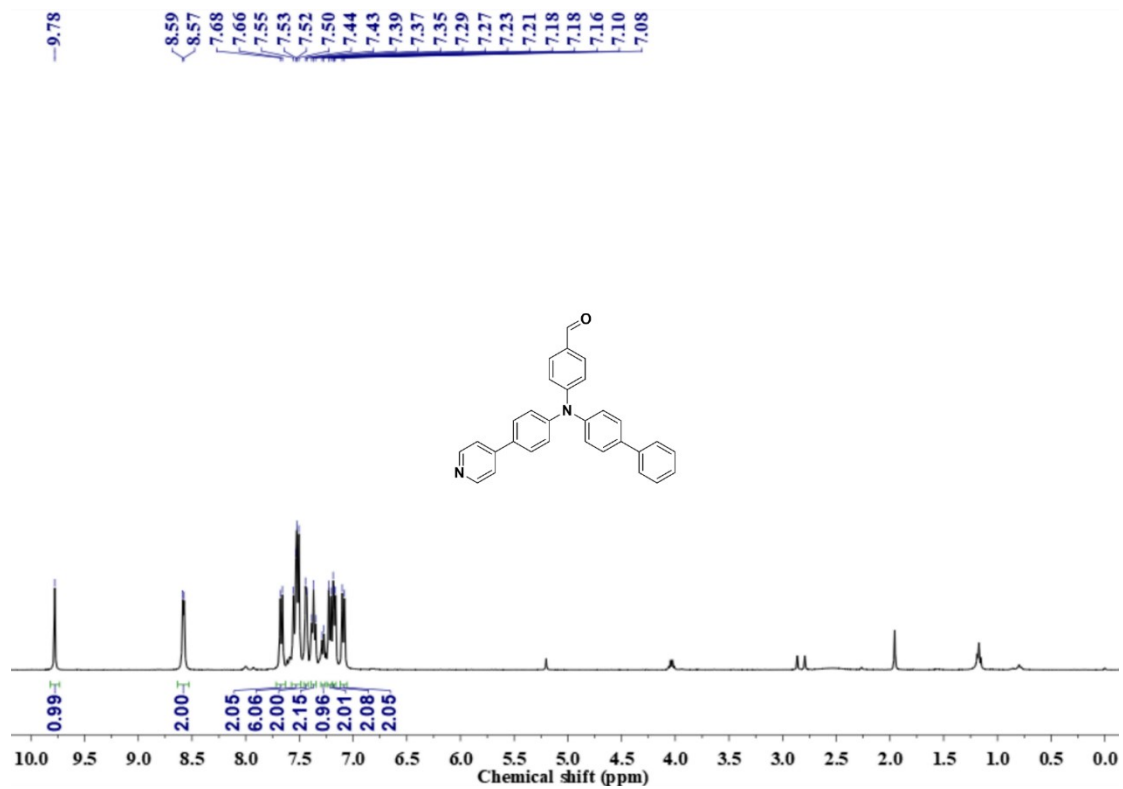

Figure S7.  $^1\text{H}$  NMR spectrum of CHO-pTPA-Py in  $\text{CDCl}_3$ .

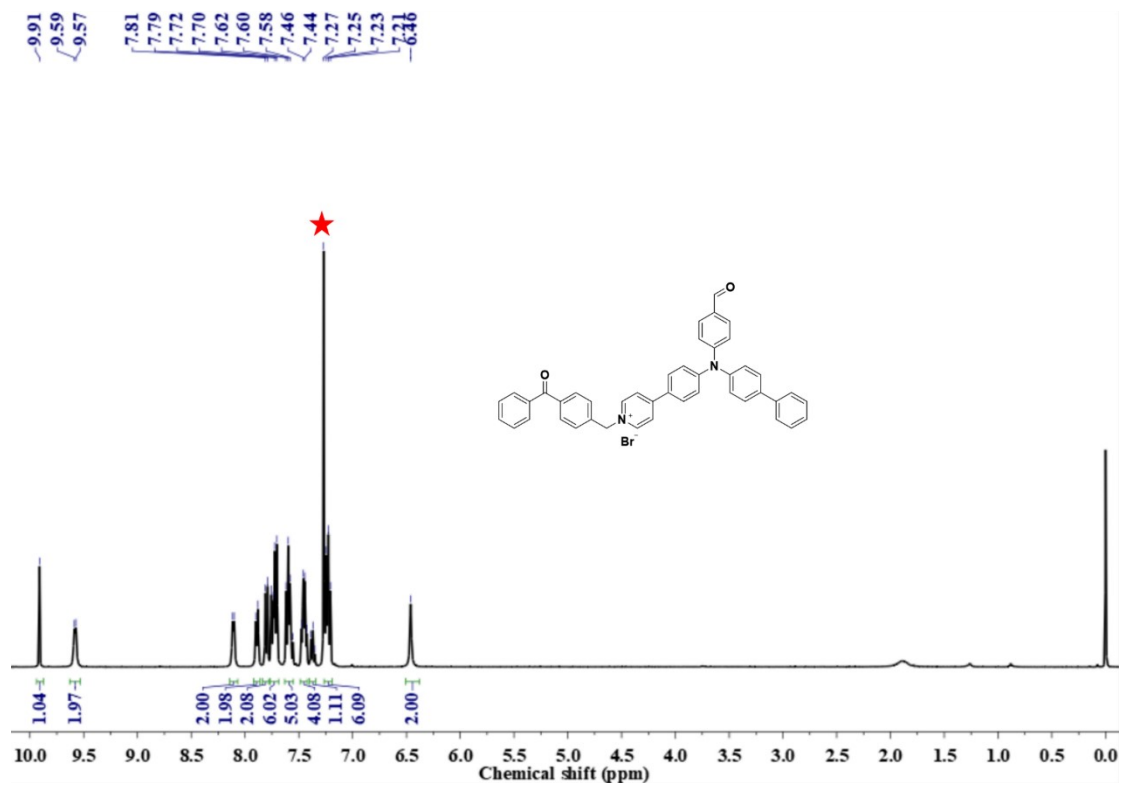

Figure S8.  $^1\text{H}$  NMR spectrum of TPAPs2 in  $\text{CDCl}_3$ .

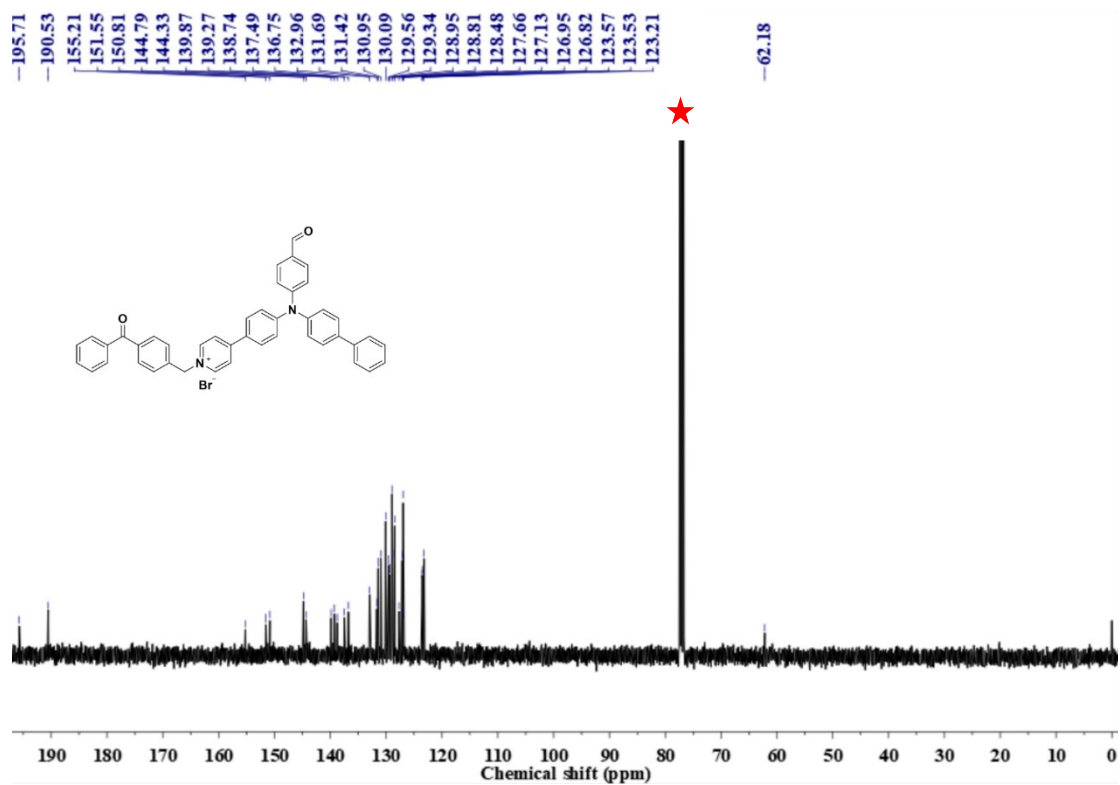

Figure S9. <sup>13</sup>C NMR spectrum of TPAPs2 in CDCl<sub>3</sub>.

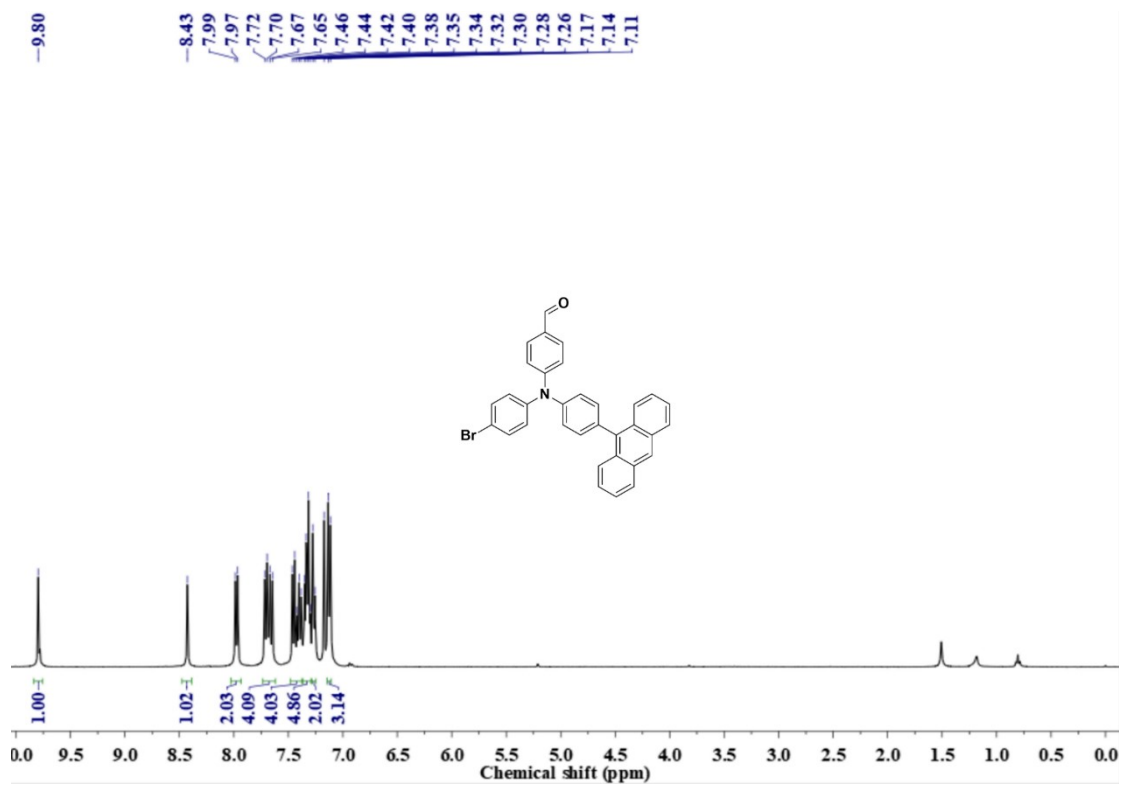

Figure S10. <sup>1</sup>H NMR spectrum of CHO-eTPA-Br in CDCl<sub>3</sub>.



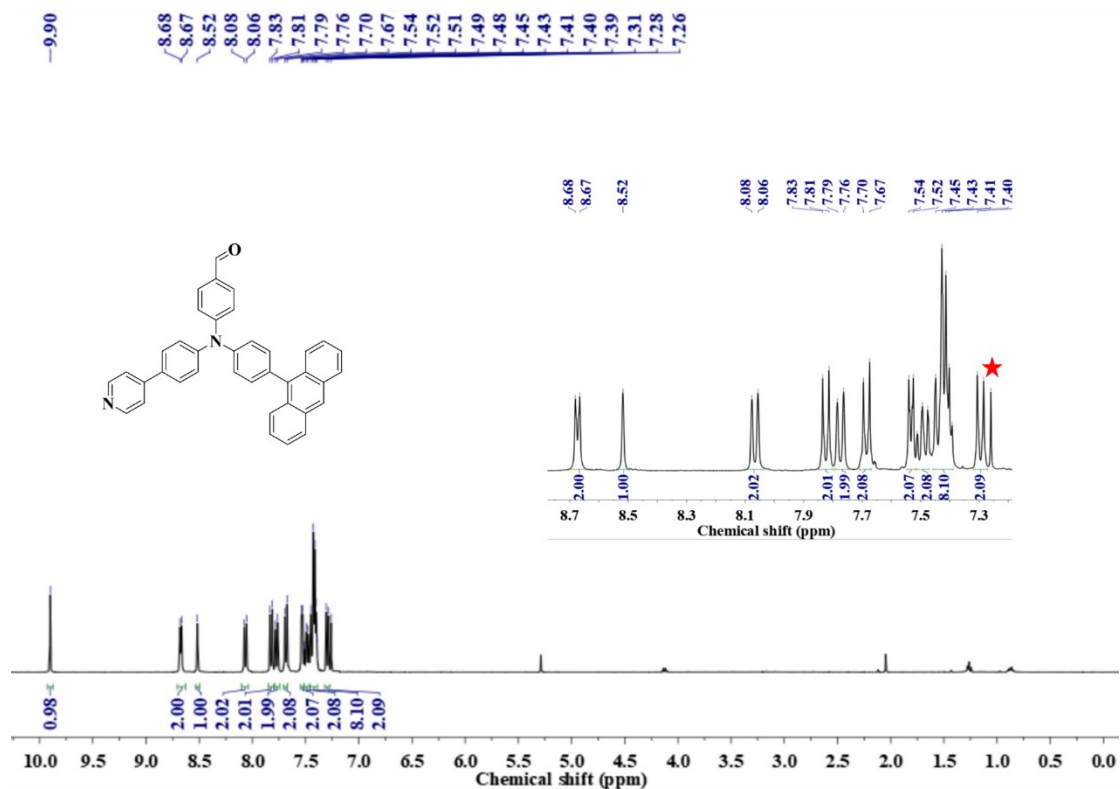

Figure S11. <sup>1</sup>H NMR spectrum of CHO-eTPA-Py in CDCl<sub>3</sub>.

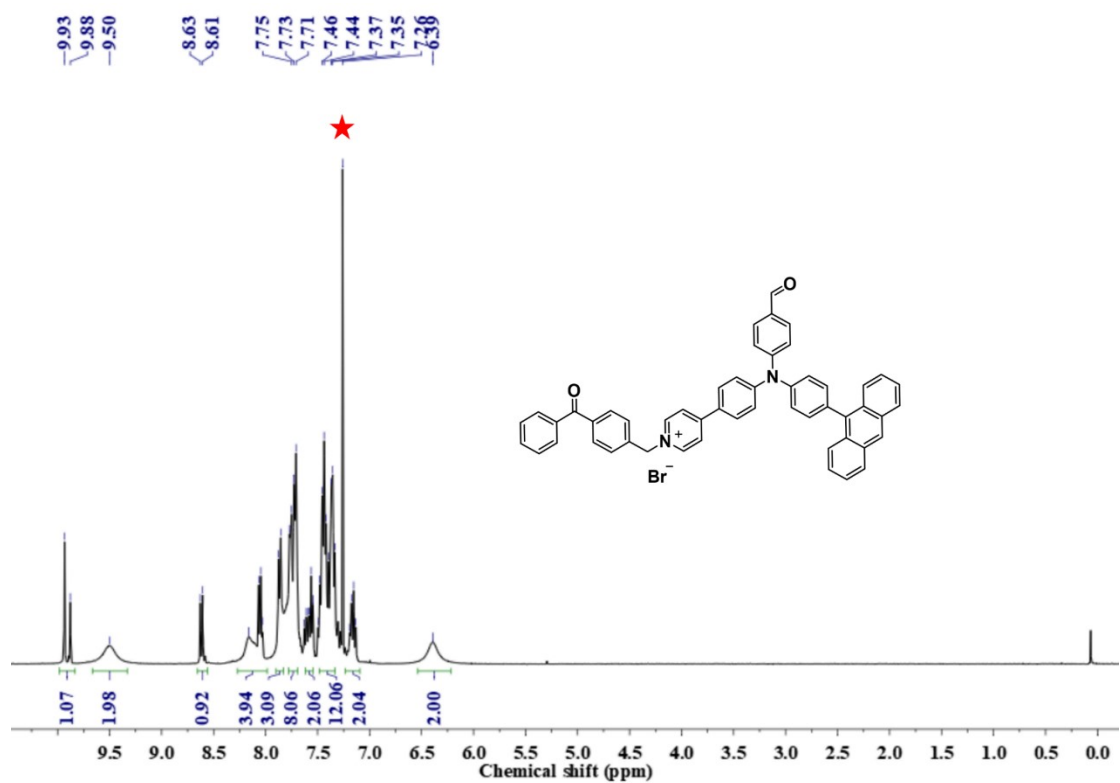

Figure S12. <sup>1</sup>H NMR spectrum of TPAPs3 in CDCl<sub>3</sub>.

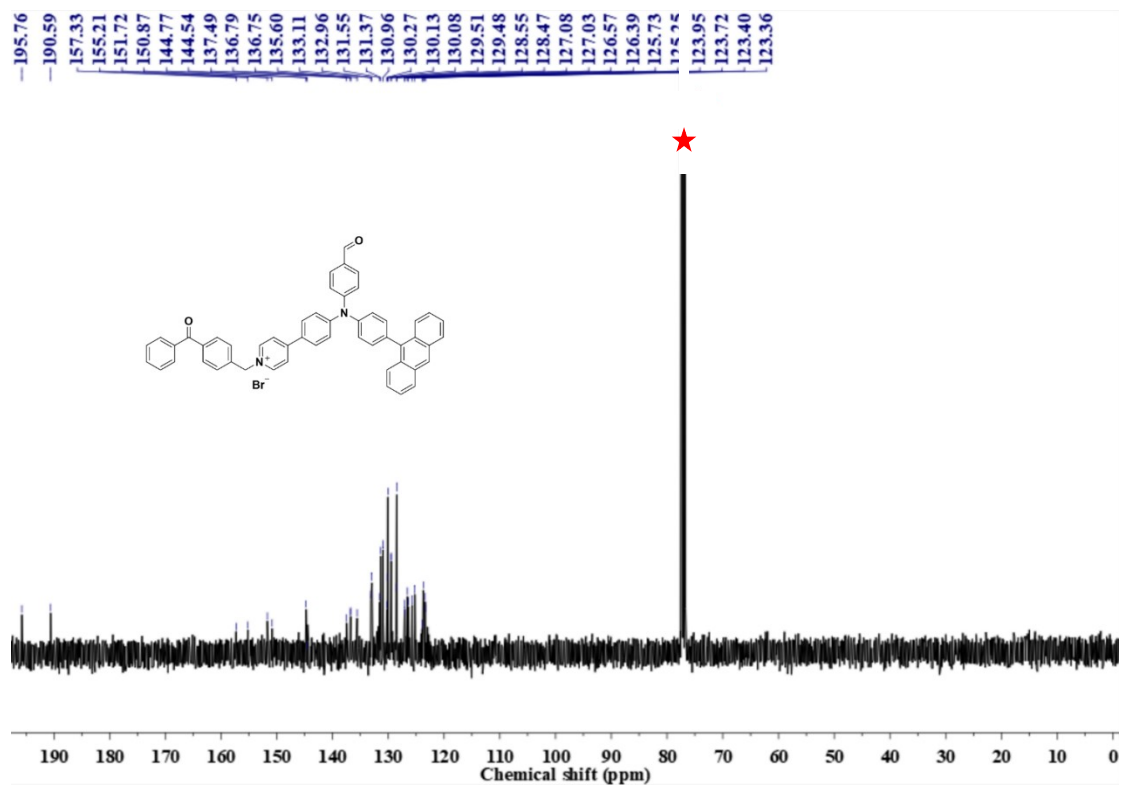

Figure S13.  $^{13}\text{C}$  NMR spectrum of TPAPs3 in  $\text{CDCl}_3$ .

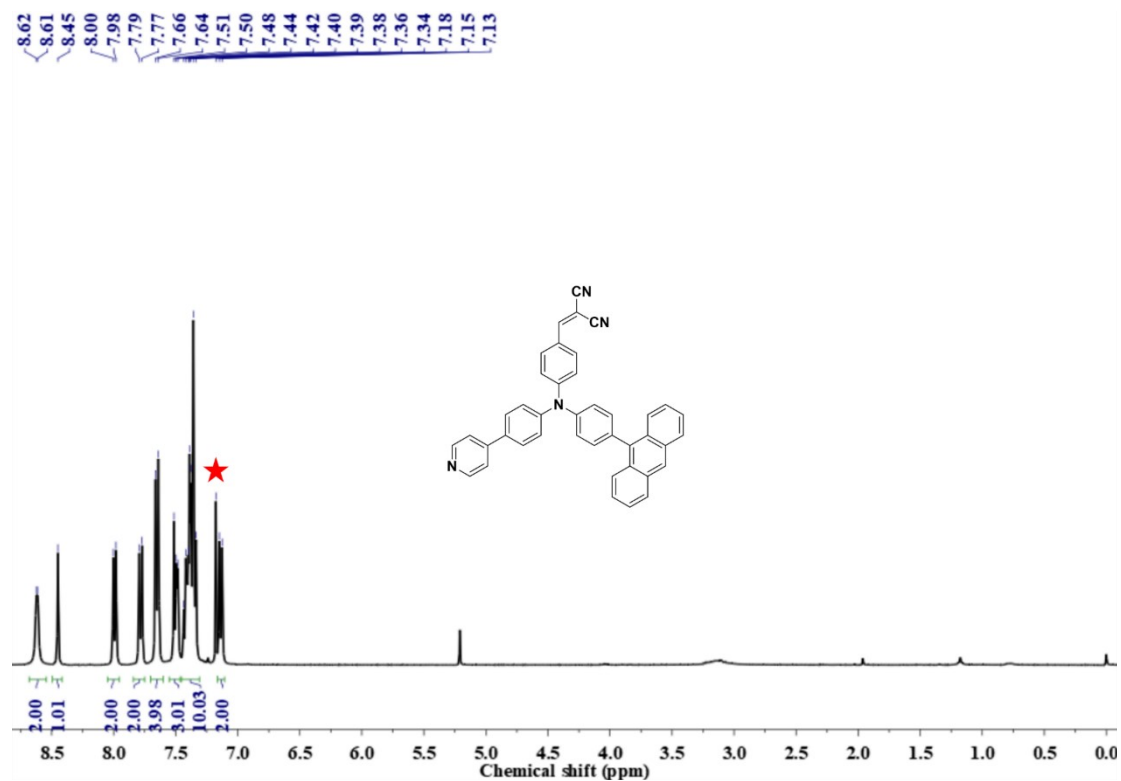

Figure S14.  $^{13}\text{C}$  NMR spectrum of 2CN-eTPA-Py in  $\text{CDCl}_3$ .

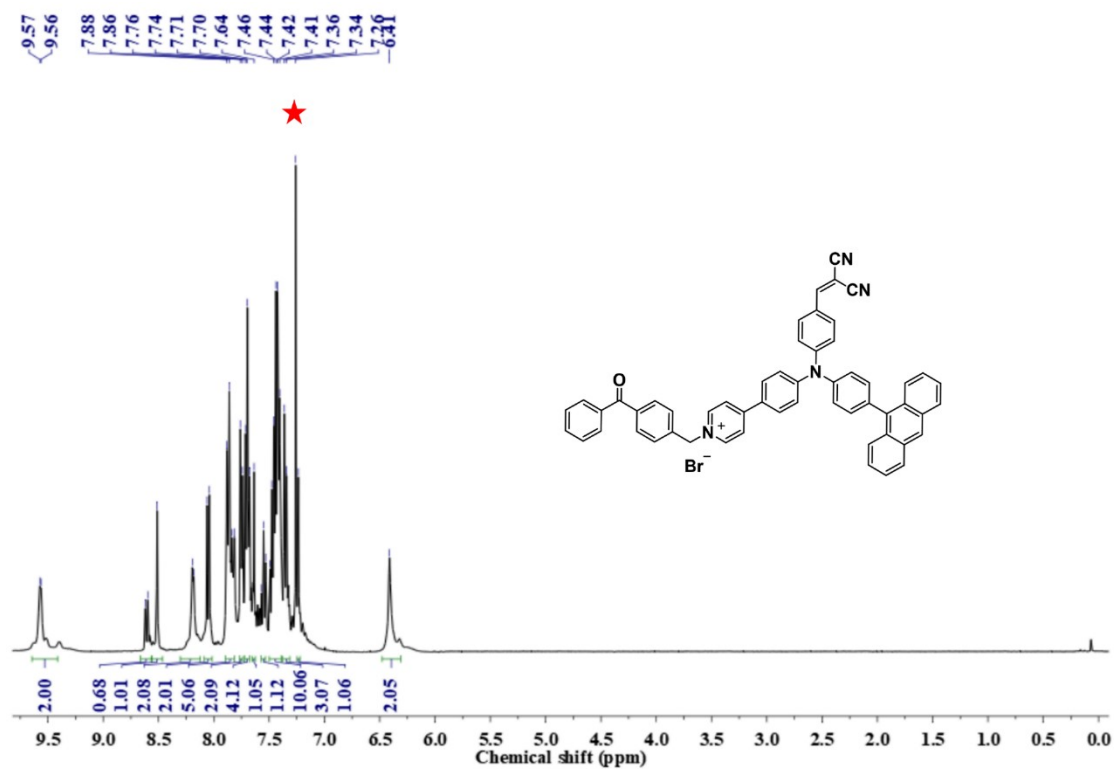

Figure S15. <sup>1</sup>H NMR spectrum of TPAPs4 in CDCl<sub>3</sub>.

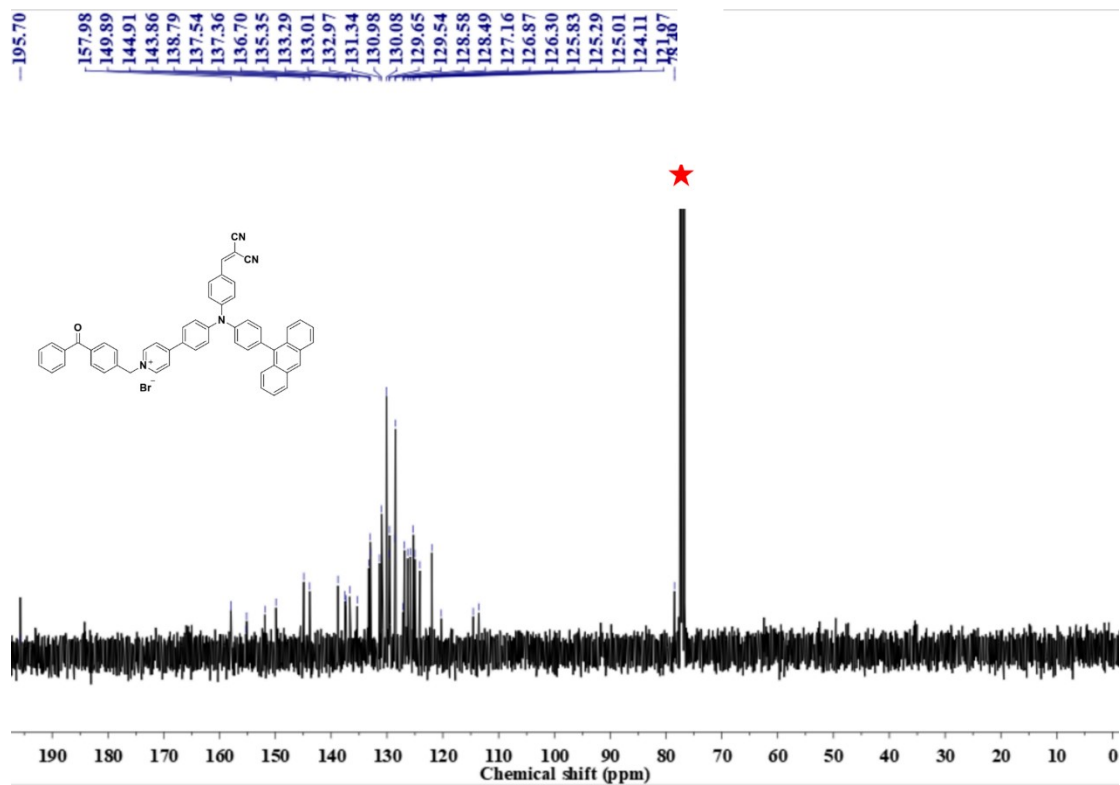

Figure S16. <sup>13</sup>C NMR spectrum of TPAPs4 in CDCl<sub>3</sub>.

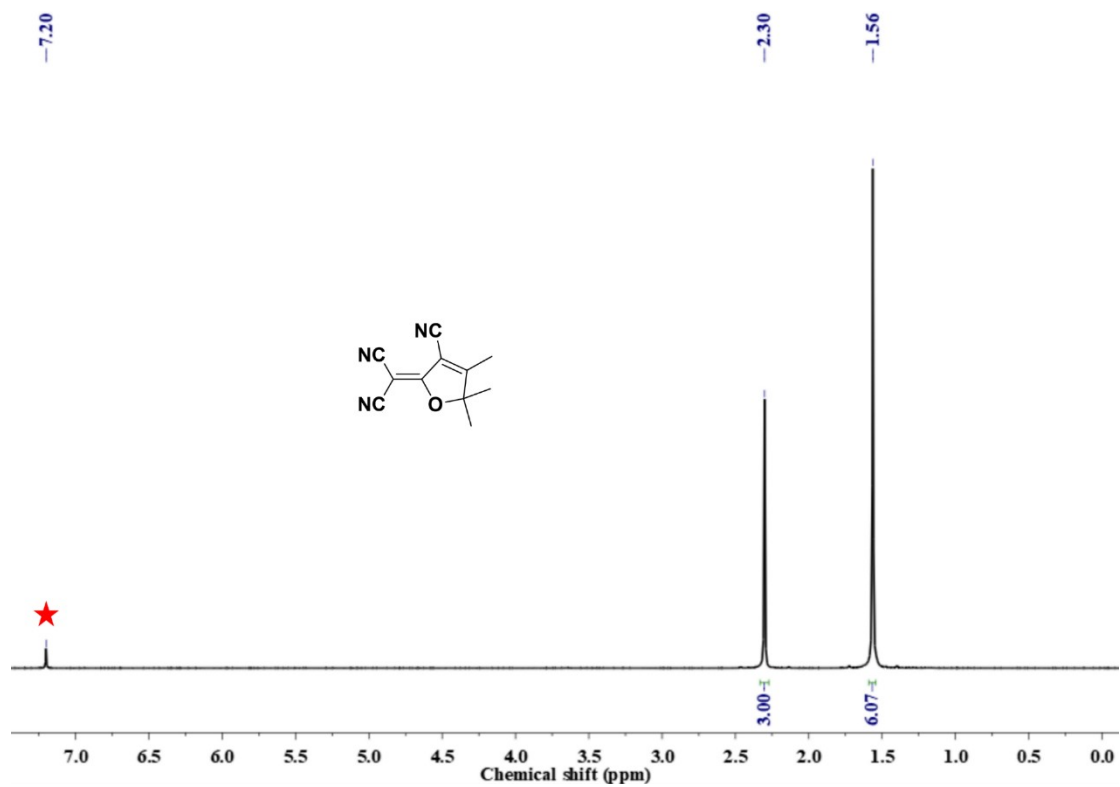

Figure S17.  $^1\text{H}$  NMR spectrum of the TCF in  $\text{CDCl}_3$ .

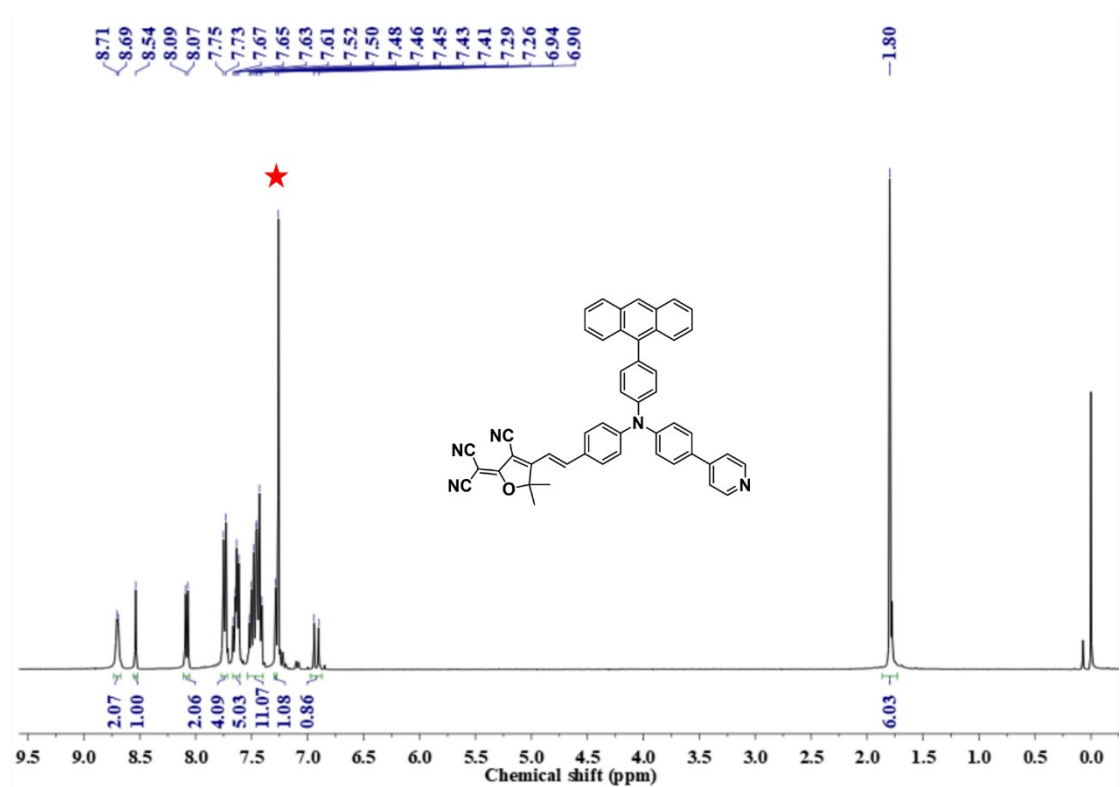

Figure S18.  $^1\text{H}$  NMR spectrum of 3CNF-eTPA-Py in  $\text{CDCl}_3$ .

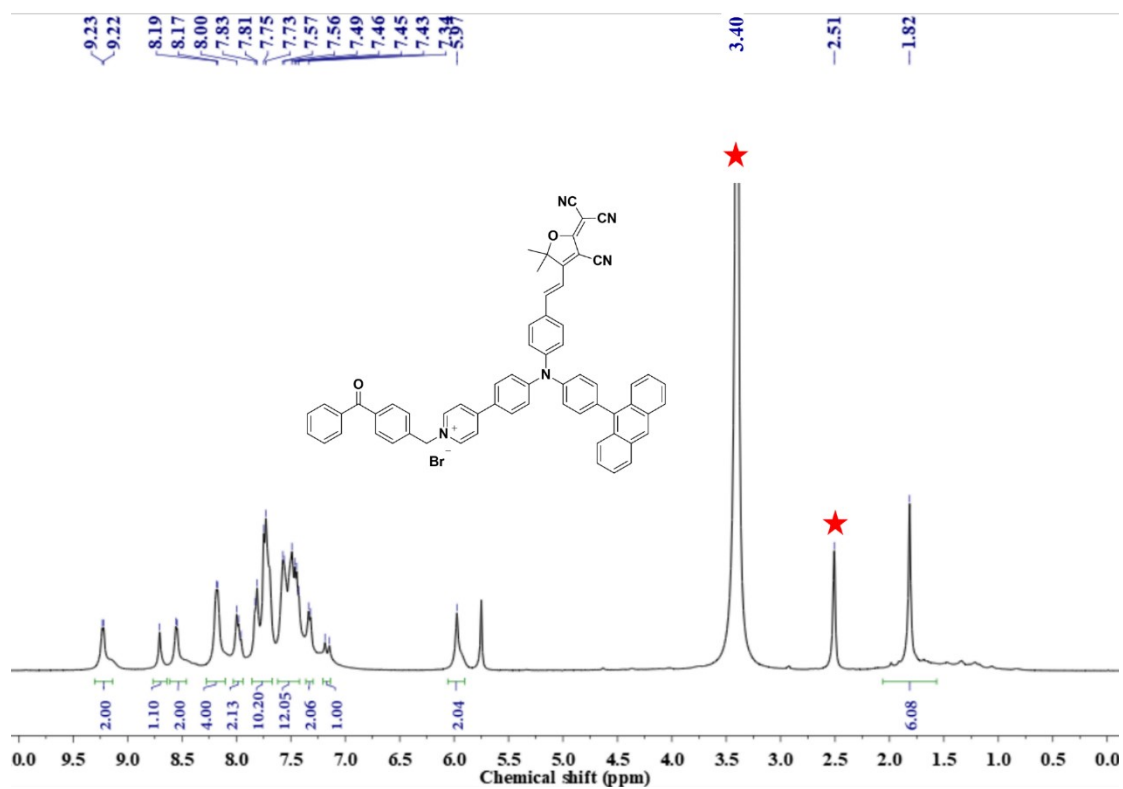

Figure S19. <sup>1</sup>H NMR spectrum of TPAPs5 in DMSO-*d*<sub>6</sub>.

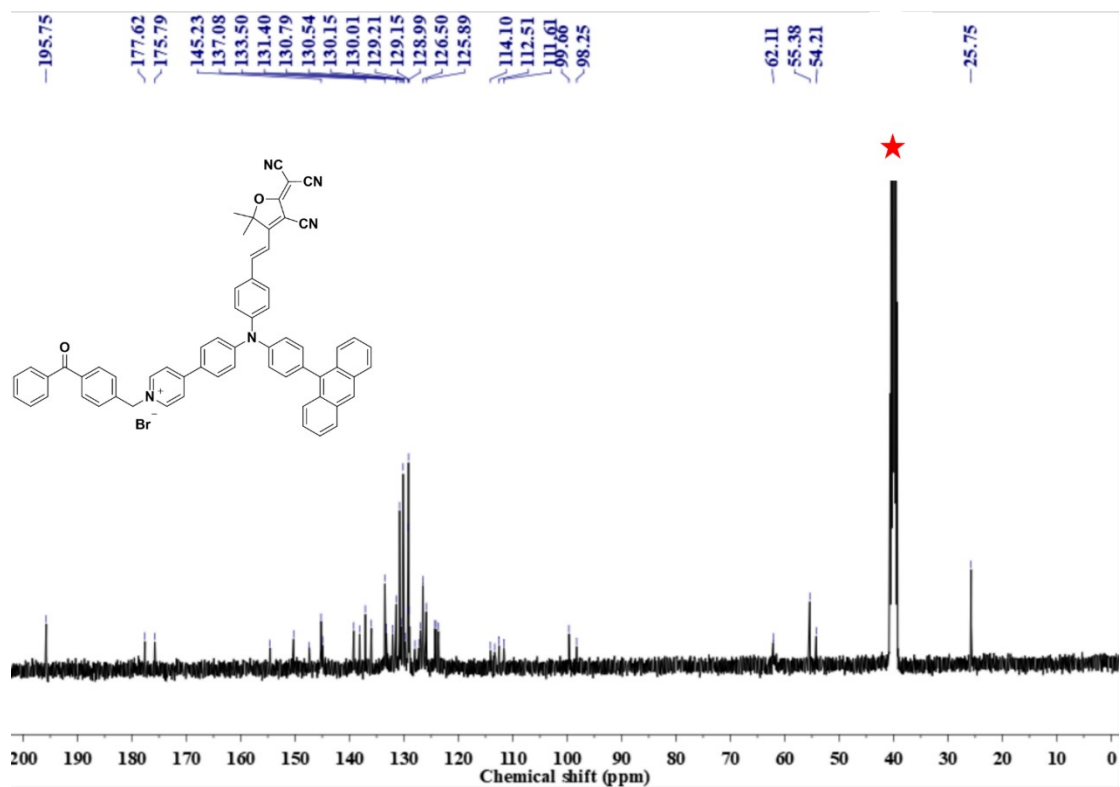

Figure S20. <sup>13</sup>C NMR spectrum of TPAPs5 in DMSO-*d*<sub>6</sub>.

12 #17 RT: 0.16 AV: 1 SB: 1 0.02 NL: 6.12E6  
T: FTMS + p ESI Full ms [150.0000-1500.0000]

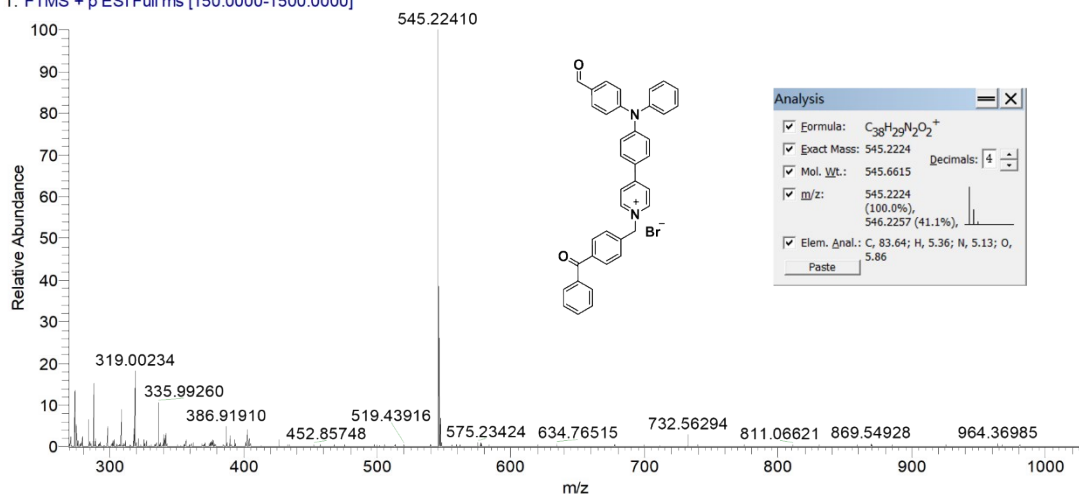

13 #5 RT: 0.04 AV: 1 SB: 1 0.02 NL: 1.09E7  
T: FTMS + p ESI Full ms [150.0000-1500.0000]

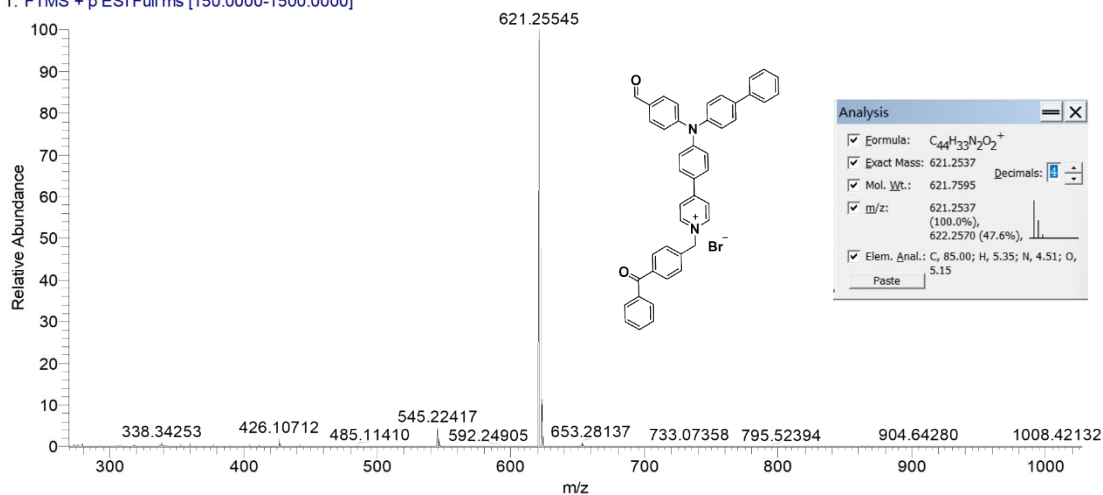

ywd-14; MW=721  
tan240126\_1 10 (0.114) Cm (10-1:7)

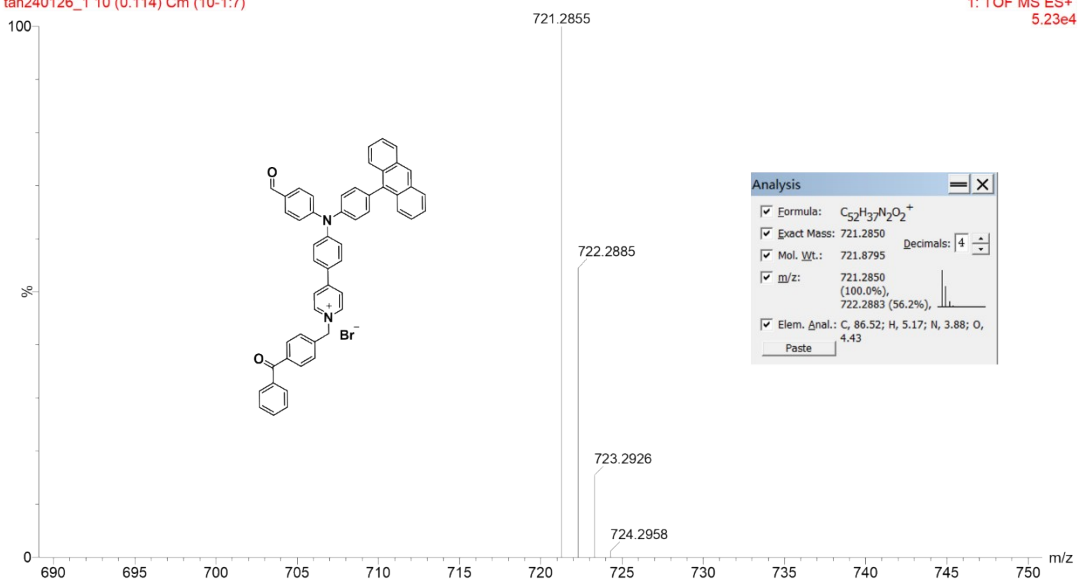

ywd-15; MW=769  
tan240126\_2\_53 (0.506) Cm (53-1:7)

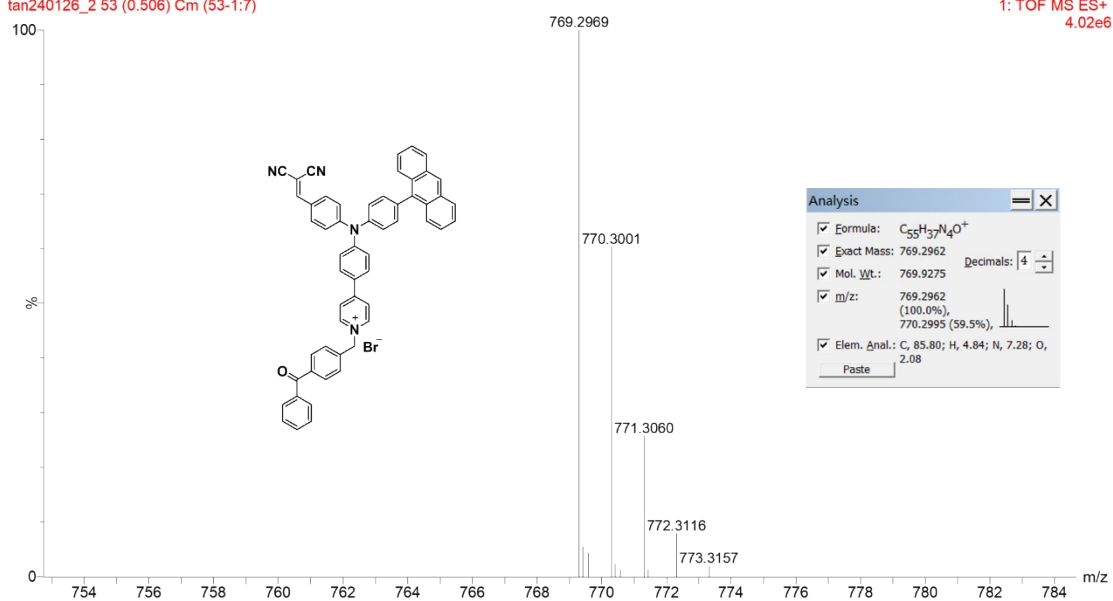

Figure S24. HRMS spectrum of TPAPs4.

ywd-16; MW=902  
tan240126\_3\_67 (0.637) Cm (67-1:7)

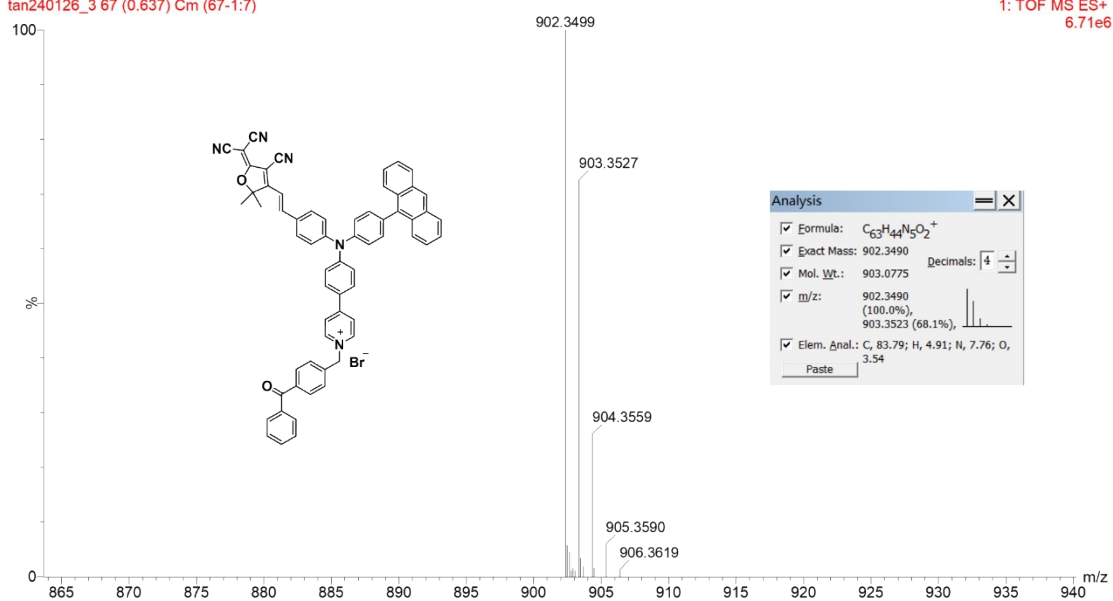

Figure S25. HRMS spectrum of TPAPs5.

## 4 Photophysical Properties

Table S1. Calculated energy of the singlet (S) and triplet (T) excited states

| Compounds      | TPAPs1 | TPAPs2 | TPAPs3 | TPAPs4 | TPAPs5 |
|----------------|--------|--------|--------|--------|--------|
| S <sub>1</sub> | 3.0048 | 2.9442 | 2.7562 | 2.6565 | 2.7395 |
| S <sub>2</sub> | 3.7954 | 3.7964 | 2.9902 | 2.9407 | 2.8841 |
| S <sub>3</sub> | 3.8293 | 3.8281 | 3.5815 | 3.5707 | 3.4187 |
| T <sub>1</sub> | 2.0282 | 1.9969 | 1.6778 | 1.6787 | 1.6303 |
| T <sub>2</sub> | 3.0460 | 3.0460 | 2.0184 | 2.0271 | 1.6770 |
| T <sub>3</sub> | 3.0665 | 3.0470 | 2.7674 | 2.2566 | 2.0479 |
| T <sub>4</sub> | 3.2326 | 3.1622 | 3.0461 | 2.6643 | 2.6587 |
| T <sub>5</sub> | 3.3865 | 3.2328 | 3.0662 | 3.0434 | 2.7617 |
| T <sub>6</sub> | 3.4620 | 3.3880 | 3.2564 | 3.2842 | 3.0440 |

Table S2. Photophysical properties of the compounds

| Compounds | $\lambda_{\text{abs}}$ (nm) | $\lambda_{\text{em}}$ (nm) | $\Phi$ | $\epsilon$ (M <sup>-1</sup> cm <sup>-1</sup> ) | $\tau$ (ns) |          | $\Delta E_{\text{L-H}}$ (eV) |
|-----------|-----------------------------|----------------------------|--------|------------------------------------------------|-------------|----------|------------------------------|
|           |                             |                            |        |                                                | $\tau_1$    | $\tau_2$ |                              |
| TPAPs1    | 425                         | 522                        | 40.53  | 31962                                          | 0.55        | 2.97     | 4.792                        |
| TPAPs2    | 428                         | 545                        | 26.47  | 30162                                          | 0.39        | 2.21     | 4.602                        |
| TPAPs3    | 427                         | 613                        | 30.57  | 32787                                          | 0.68        | 3.54     | 3.623                        |
| TPAPs4    | 456                         | 630                        | 10.23  | 35314                                          | 0.45        | 2.87     | 3.517                        |
| TPAPs5    | 530                         | 715                        | 0.45   | 30628                                          | 0.40        | 1.97     | 3.614                        |

Table S3. Simulated recombination energy of the compounds

|                       | TPAPs1        | TPAPs2        | TPAPs3        | TPAPs4        | TPAPs5        |
|-----------------------|---------------|---------------|---------------|---------------|---------------|
| E1                    | -1724.720357  | -1955.696028  | -2262.796848  | -2411.292794  | -2850.185607  |
| E2                    | -1724.609930  | -1955.587828  | -2262.756707  | -2411.256563  | -2850.155863  |
| E3                    | -1724.582138  | -1955.559025  | -2262.723872  | -2411.220435  | -2850.112022  |
| E4                    | -1724.698083  | -1955.659195  | -2262.766675  | -2411.265228  | -2850.153745  |
| $\Delta E_{\text{x}}$ | 0.027792      | 0.028803      | 0.032835      | 0.036128      | 0.043841      |
|                       | 0.75622032 eV | 0.78372963 eV | 0.89344035 eV | 0.98304288 eV | 1.19291361 eV |
| $\Delta E_{\text{y}}$ | 0.022274      | 0.036833      | 0.030173      | 0.027566      | 0.031862      |
|                       | 0.60607554 eV | 1.00222593 eV | 0.82100733 eV | 0.75007086 eV | 0.86696502 eV |
| Er                    | 1.3623 eV     | 1.7859 eV     | 1.7144 eV     | 1.7331 eV     | 2.0598 eV     |

## 5 AIE Properties



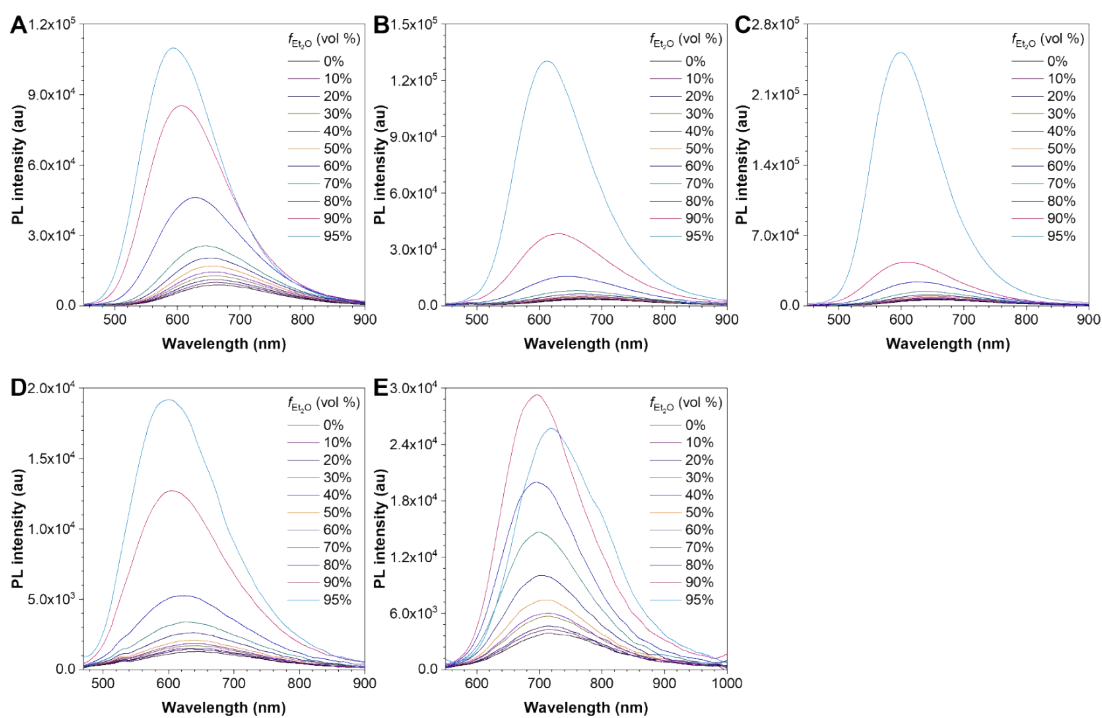

**Figure S26.** PL spectra of (A) TPAPs1, (B) TPAPs2, (C) TPAPs3, (D) TPAPs4 and (E) TPAPs5 in acetonitrile/diethyl ether mixture with different diethyl ether fractions (0-95%).

## 6 Solvation Effect

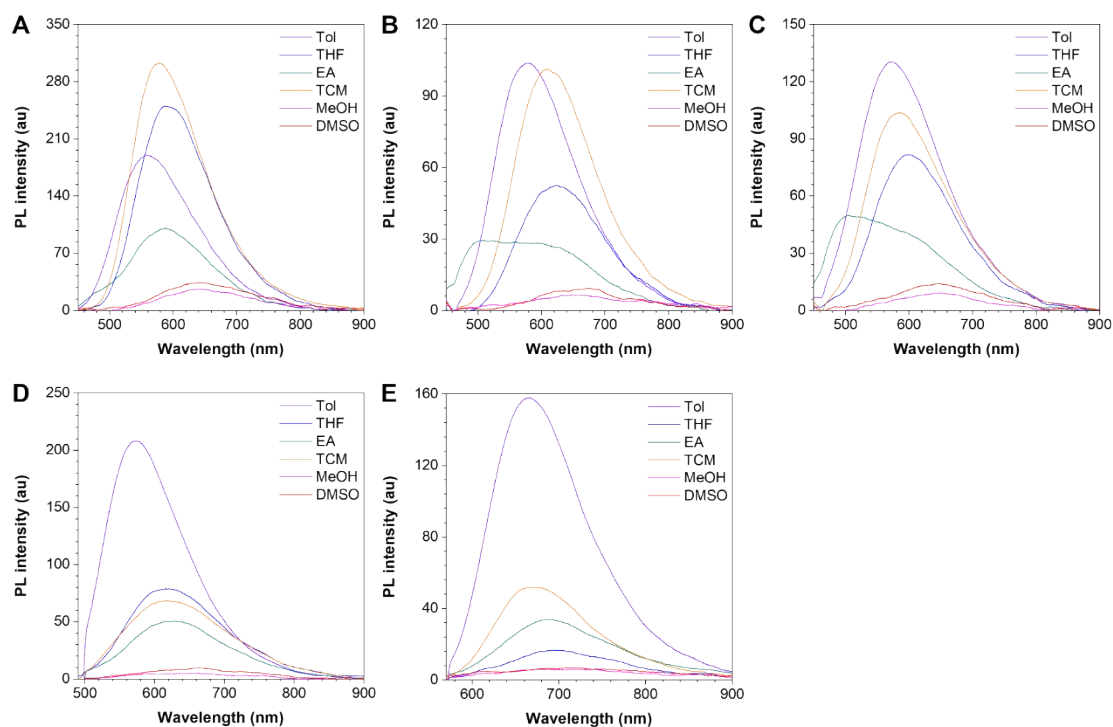

**Figure S27.** PL spectra of (A) TPAPs1, (B) TPAPs2, (C) TPAPs3, (D) TPAPs4 and (E) TPAPs5 in different solvents.

## 7 ROS Generation

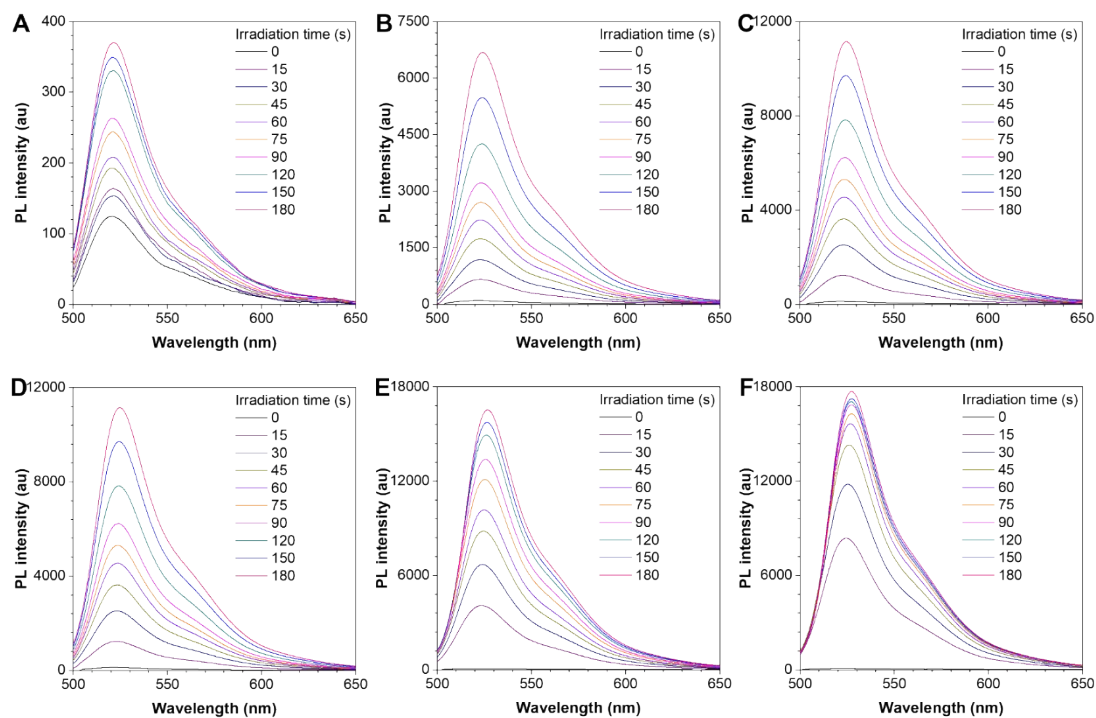

**Figure S28.** ROS generation of (A) DCFH, (B) TPAPs1, (C) TPAPs2, (D) TPAPs3, (E) TPAPs4 and (F) TPAPs5 upon exposure to white light using DCFH (10  $\mu$ M) as an indicator.

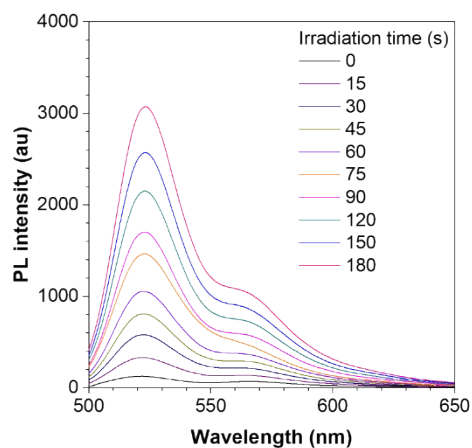

**Figure S29.** (A) ROS generation of RB (1  $\mu$ M) upon exposure to white light using DCFH (10  $\mu$ M) as an indicator.

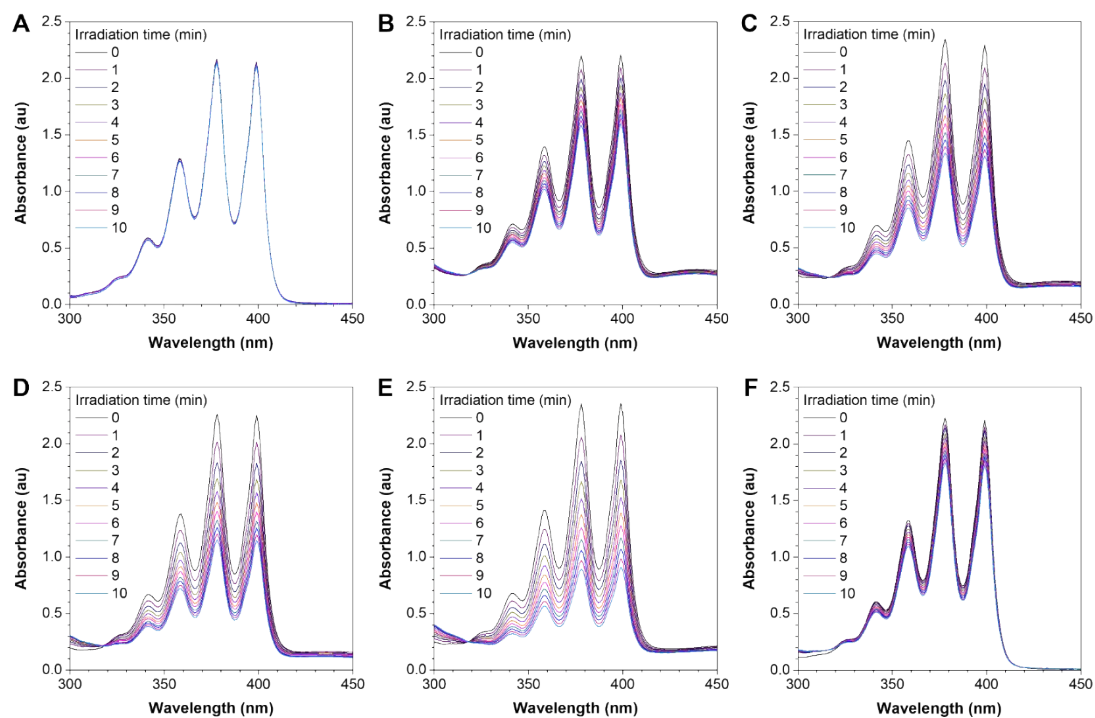

**Figure S30.** Absorption of ABDA (200  $\mu\text{M}$ ,  $^1\text{O}_2$  probe) in water in the absence (black, A) and presence of (B) TPAPs1, (C) TPAPs2, (D) TPAPs3, (E) TPAPs4 and (F) RB (10  $\mu\text{M}$ ) under white light irradiation for different time.

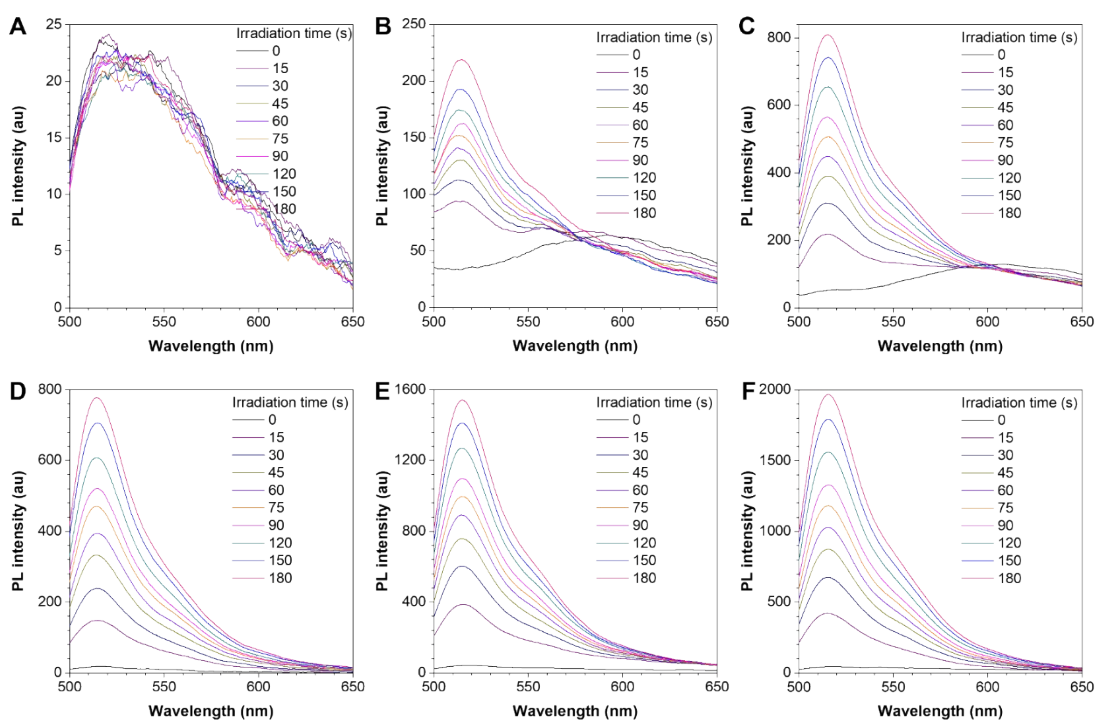

**Figure S31.** PL spectra of HPF (5  $\mu\text{M}$ ,  $\text{OH}\cdot$  probe) in the absence (black, A) and presence of (B) TPAPs1, (C) TPAPs2, (D) TPAPs3, (E) TPAPs4 and (F) TPAPs5 (1  $\mu\text{M}$ ) in PBS upon white light irradiation with 10  $\text{mW}/\text{cm}^2$  for different time.

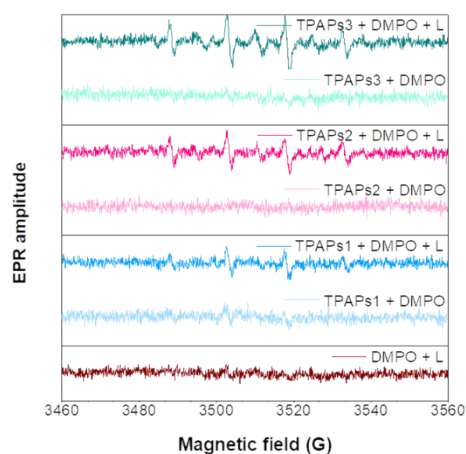

**Figure S32.** EPR signals of DMPO (10  $\mu\text{L}$ ) in the presence TPAPs1, TPAPs2 and TPAPs3 in  $\text{H}_2\text{O}$  with/without white light irradiation (10  $\text{mW}/\text{cm}^2$ ) for 5 min.

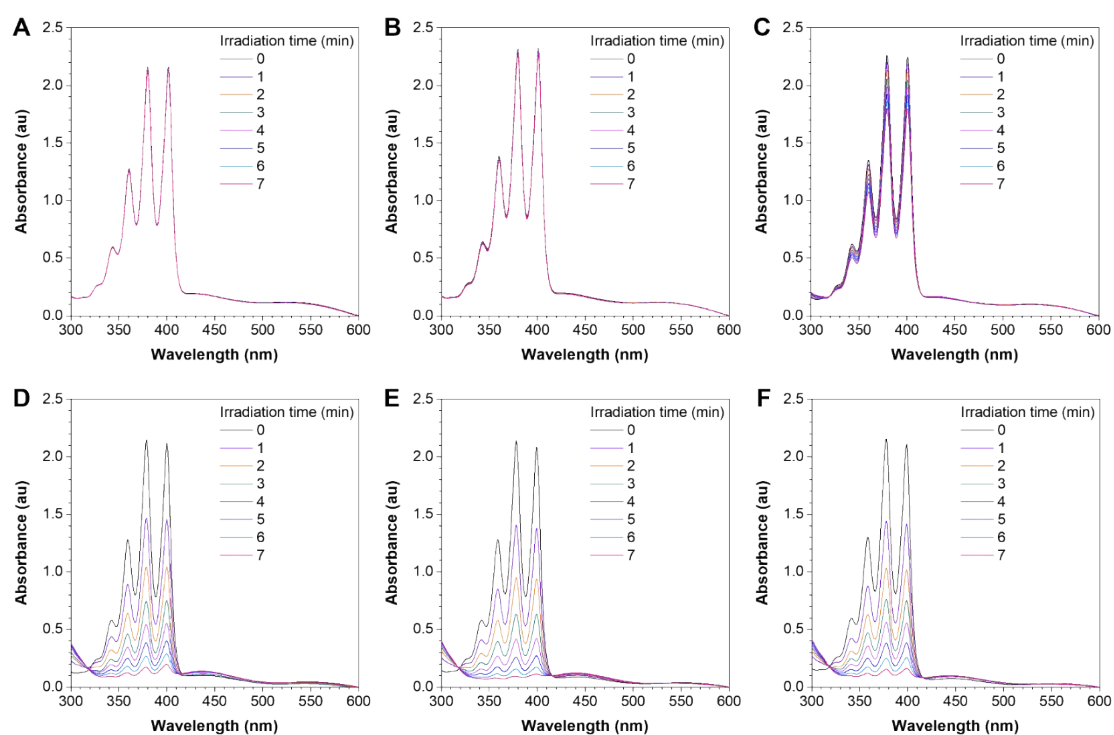

**Figure S33.** Absorption spectra of ABDA (200  $\mu\text{M}$ ,  $^1\text{O}_2$  probe) in the presence of TPAPs5 (10  $\mu\text{M}$ ) in DMSO/ $\text{H}_2\text{O}$  mixture with different  $\text{H}_2\text{O}$  fractions (0%, 20%, 40%, 60%, 80% and 95%) upon white-light irradiation (25  $\text{mW}/\text{cm}^2$ ).

## 8 Photothermal Conversion

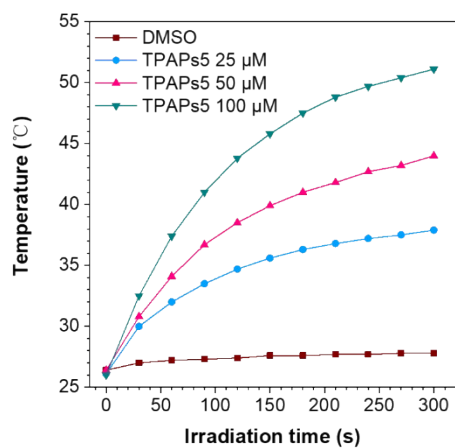

**Figure S34.** Corresponding heating curves of different concentration of TPAPs5 in DMSO solution (25, 50, 100  $\mu\text{M}$ ) under 532 nm ( $0.3 \text{ W/cm}^2$ ) laser irradiation.

## 9 Cell Imaging and Cell Viability

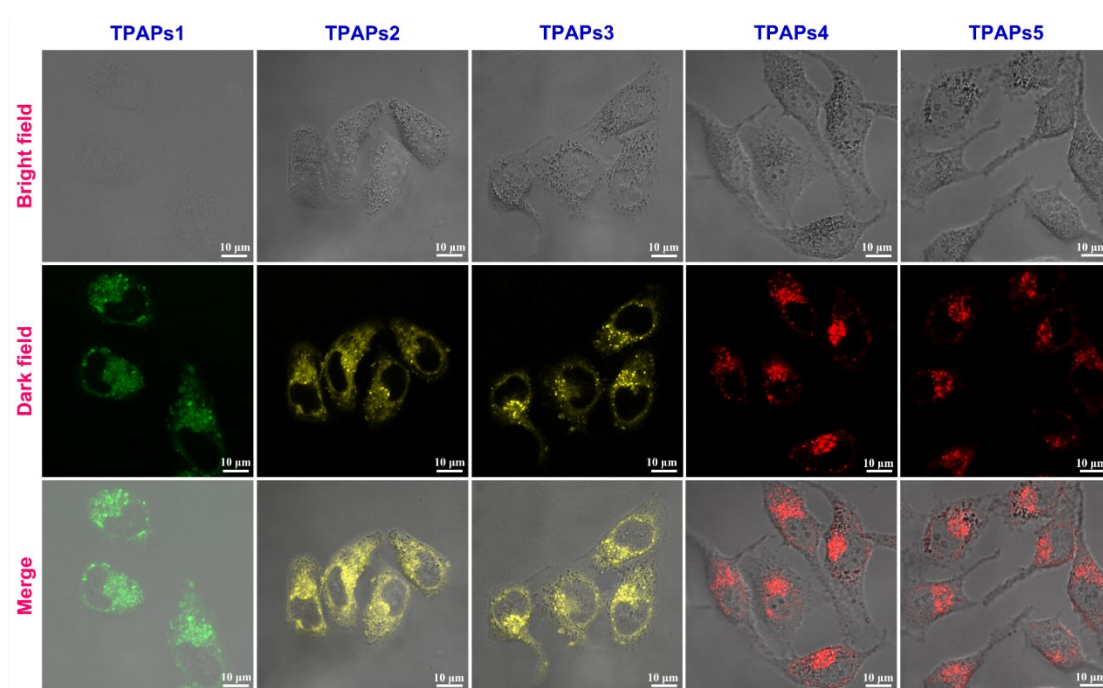

**Figure S35.** Fluorescence images of HeLa cells stained with 10  $\mu\text{M}$  TPAPs1, TPAPs2, TPAPs3, TPAPs4 and TPAPs5 for 0.5 h, respectively.

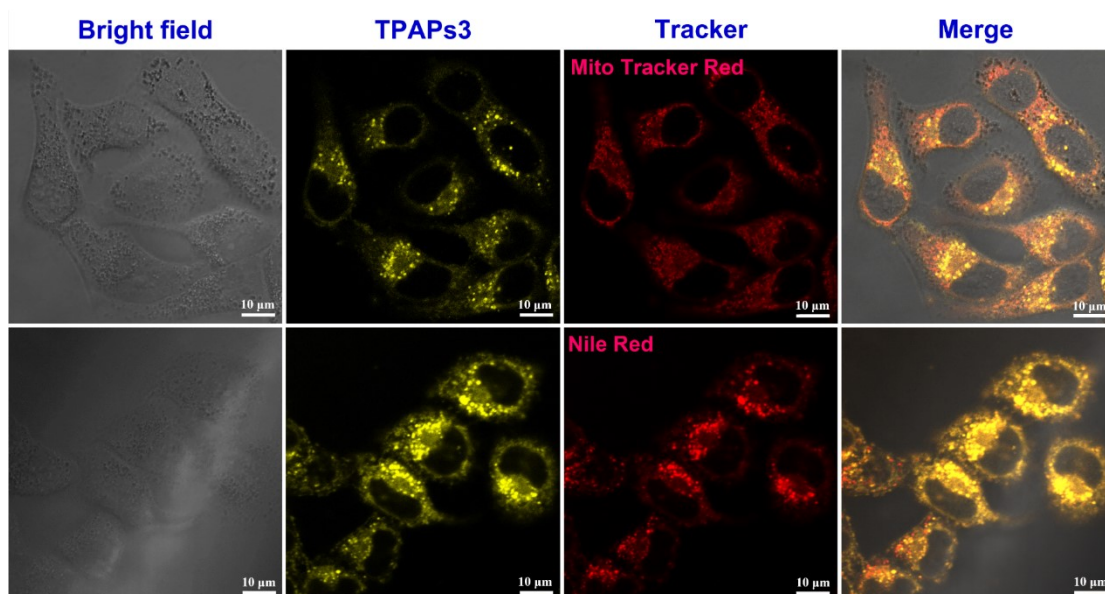

**Figure S36.** CLSM images of HeLa cells co-stained with TPAPs3 (conc.: 10  $\mu$ M; incubation time: 0.5 h) and Mito-Tracker Red and Nile red (conc.: 1  $\mu$ M; incubation time: 0.5 h).

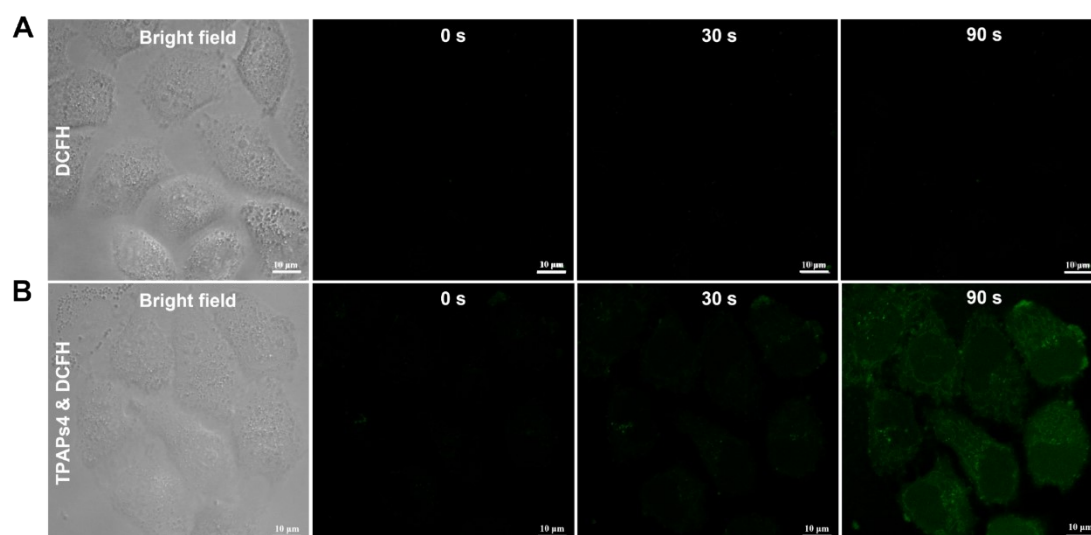

**Figure S37.** Intracellular ROS generation of (A) PBS and (B) TPAPs4 (conc.: 5  $\mu$ M, incubation time: 0.5 h) were evaluated by DCFH-DA upon white light irradiation (microscope) for different time.



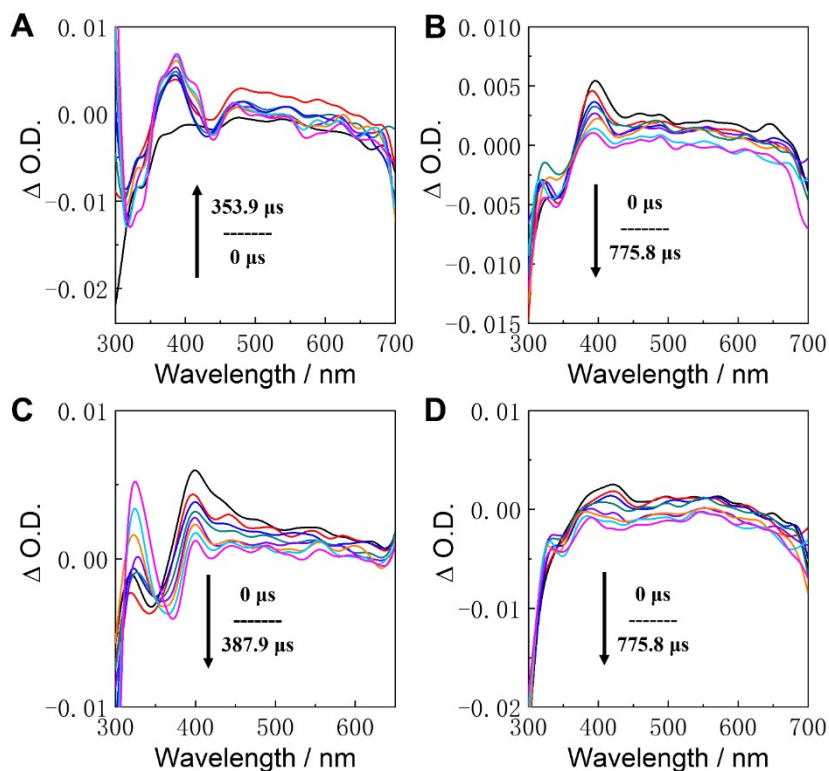

**Figure S38.** Nanosecond transient absorption spectra of (A) TPAPs1, (B) TPAPs2, (C) TPAPs3 and (D) TPAPs4 in different time, conditions:  $c = 1 \times 10^{-5}$  M, in DMSO,  $N_2$ , 298K.

**Table S4.** Cartesian coordinates of optimized TPAPs1 calculated by the DFT, CAM-B3LYP/6-311G(d), Gaussian 09 program

| atom | x           | y           | z           |
|------|-------------|-------------|-------------|
| C    | 8.20505512  | -1.73199197 | 0.09897306  |
| C    | 9.44819466  | -2.31359233 | 0.34882596  |
| C    | 9.52989677  | -3.53790250 | 0.98748853  |
| C    | 8.36951034  | -4.20600205 | 1.35938945  |
| C    | -6.44100265 | 1.03558690  | 0.28139102  |
| C    | -7.27029436 | 0.81815414  | 1.37442412  |
| C    | -8.34789647 | 1.66185706  | 1.59840150  |
| C    | -8.59385482 | 2.72415517  | 0.73972515  |
| C    | -7.76275592 | 2.93853181  | -0.35140740 |
| C    | -6.68983851 | 2.09228332  | -0.58724588 |
| H    | -7.07237509 | -0.01294827 | 2.04006911  |
| H    | -8.99529567 | 1.48978942  | 2.44918448  |
| H    | -9.43566660 | 3.38150017  | 0.91753223  |
| H    | -7.95754839 | 3.75987442  | -1.02982963 |
| H    | -6.04491840 | 2.24487920  | -1.44432548 |
| C    | -4.04637999 | 0.60581261  | 0.02224191  |
| C    | -3.00895200 | -0.13453770 | -0.58047084 |
| C    | -1.72230950 | 0.34189911  | -0.59563708 |

---

|   |             |             |             |
|---|-------------|-------------|-------------|
| C | -1.37714131 | 1.56821870  | -0.00265761 |
| C | -2.41682489 | 2.29850315  | 0.59771990  |
| C | -3.71202883 | 1.84533804  | 0.60454496  |
| H | -3.22916386 | -1.08466430 | -1.04492848 |
| H | -0.96350107 | -0.27355420 | -1.06183131 |
| H | -2.21823937 | 3.26159489  | 1.05058514  |
| H | -4.48421344 | 2.44198738  | 1.06807829  |
| C | -5.65761728 | -1.23032961 | -0.18528085 |
| C | -6.62608424 | -1.57246706 | -1.12249861 |
| C | -6.95469088 | -2.90475559 | -1.31357629 |
| C | -6.31836635 | -3.89868202 | -0.58042960 |
| C | -5.35390023 | -3.55052581 | 0.36287331  |
| C | -5.02953894 | -2.22472562 | 0.56705230  |
| H | -7.12000607 | -0.79544138 | -1.69145317 |
| H | -7.70901252 | -3.17434945 | -2.04478918 |
| N | -5.34190748 | 0.14486373  | 0.03506628  |
| H | -4.88362754 | -4.33988767 | 0.93616538  |
| H | -4.29601558 | -1.94774506 | 1.31404717  |
| C | -0.01349594 | 2.05748157  | -0.01147299 |
| C | 0.44162835  | 3.03636909  | 0.89608964  |
| C | 1.73239772  | 3.48059868  | 0.86452031  |
| C | 2.23131192  | 2.06043929  | -0.91198730 |
| C | 0.95179533  | 1.58552080  | -0.92593015 |
| H | -0.21169693 | 3.43724994  | 1.65654311  |
| H | 2.09998422  | 4.22611258  | 1.55603545  |
| H | 2.98697348  | 1.71151205  | -1.60172976 |
| H | 0.69430179  | 0.85413048  | -1.67735373 |
| C | 4.01130169  | 3.54988461  | -0.07686944 |
| H | 4.14705469  | 4.11599983  | 0.84372120  |
| H | 4.05588194  | 4.25086815  | -0.91141794 |
| C | 5.06372233  | 2.48478141  | -0.21446521 |
| C | 5.35452582  | 1.63927925  | 0.85248433  |
| C | 6.32911839  | 0.66291231  | 0.72659660  |
| C | 7.03882297  | 0.52827515  | -0.46518394 |
| C | 6.76601527  | 1.39231293  | -1.52097527 |
| C | 5.77777882  | 2.35489865  | -1.40228430 |
| H | 4.82867142  | 1.74971155  | 1.79482676  |
| H | 6.55969055  | 0.02487436  | 1.56948665  |
| H | 5.57837843  | 3.02469839  | -2.23188384 |
| H | 7.35511624  | 1.30637421  | -2.42478007 |
| C | 7.12827615  | -3.64695936 | 1.09128976  |
| C | 7.04439553  | -2.41024351 | 0.46949925  |
| H | 10.33930380 | -1.78904310 | 0.02909968  |
| H | 10.49822573 | -3.97833490 | 1.18971649  |

---



|   |             |             |             |
|---|-------------|-------------|-------------|
| H | 8.43372362  | -5.16848410 | 1.85221677  |
| H | 6.22425408  | -4.17784507 | 1.36300887  |
| H | 6.07180357  | -1.99001085 | 0.24641629  |
| C | -6.66216450 | -5.32584431 | -0.78897056 |
| O | -6.13815171 | -6.23193229 | -0.19860247 |
| N | 2.62476626  | 3.00102367  | -0.02681277 |
| C | 8.18465507  | -0.43707446 | -0.63806743 |
| O | 9.08818718  | -0.12817772 | -1.38082298 |
| H | -7.45196652 | -5.51393983 | -1.54350321 |

**Table S5.** Cartesian coordinates of optimized TPAPs2 calculated by the DFT, CAM-B3LYP/6-311G(d), Gaussian 09 program

| atom | x            | y           | z           |
|------|--------------|-------------|-------------|
| C    | -9.18575074  | 1.72835785  | 1.15783437  |
| C    | -10.40880515 | 2.14437554  | 1.68422040  |
| C    | -10.46674323 | 2.72870598  | 2.93670703  |
| C    | -9.29997815  | 2.92742552  | 3.66493825  |
| C    | 4.78407395   | 0.35864005  | 0.01985637  |
| C    | 5.86323052   | 0.52770471  | -0.83757874 |
| C    | 6.43029612   | 1.78087410  | -0.99660257 |
| C    | 5.93086382   | 2.89212590  | -0.31517076 |
| C    | 4.84501071   | 2.70278724  | 0.54178987  |
| C    | 4.28042299   | 1.45061336  | 0.71632476  |
| H    | 6.26644195   | -0.32642745 | -1.36778504 |
| H    | 7.28722539   | 1.89616729  | -1.64840202 |
| H    | 4.43143201   | 3.55082489  | 1.07328261  |
| H    | 3.44192174   | 1.31793987  | 1.38963248  |
| C    | 2.89556997   | -1.18873985 | -0.10072057 |
| C    | 2.21354538   | -2.30601778 | 0.42404033  |
| C    | 0.89988850   | -2.54014543 | 0.10657743  |
| C    | 0.17392351   | -1.67867970 | -0.73433610 |
| C    | 0.85699449   | -0.55918249 | -1.24059210 |
| C    | 2.17427925   | -0.31804637 | -0.94309897 |
| H    | 2.72461787   | -2.97417660 | 1.10202916  |
| H    | 0.41350756   | -3.39082842 | 0.56719697  |
| C    | 7.51243979   | 5.92324595  | -1.91946065 |
| H    | 0.36266494   | 0.11759337  | -1.92611625 |
| H    | 2.67295409   | 0.53726282  | -1.37576306 |
| C    | 5.07347245   | -1.96724597 | 0.70831942  |
| C    | 5.84032937   | -1.72383713 | 1.84264220  |
| C    | 6.69783608   | -2.70447971 | 2.31384694  |
| C    | 6.79106631   | -3.92942833 | 1.66472558  |
| C    | 6.02671232   | -4.16592260 | 0.52412119  |
| C    | 5.17855474   | -3.18978052 | 0.04203434  |

---

|   |              |             |             |
|---|--------------|-------------|-------------|
| H | 5.76579047   | -0.76817177 | 2.34513600  |
| H | 7.29599867   | -2.51738681 | 3.19904075  |
| N | 4.21345416   | -0.94532801 | 0.20442194  |
| H | 6.12870171   | -5.12052546 | 0.02287077  |
| H | 4.59921253   | -3.36118854 | -0.85665745 |
| C | 7.68675410   | 6.76030005  | -0.82668577 |
| C | 6.71814071   | 5.08376868  | 0.59854641  |
| H | 6.79405177   | 4.03201404  | -2.61649752 |
| H | 6.43339340   | 4.75251012  | 1.59018937  |
| C | 7.28850944   | 6.33612676  | 0.43296362  |
| H | 7.81512351   | 6.24957289  | -2.90699862 |
| H | 8.13267293   | 7.73873841  | -0.95596624 |
| H | 7.43030872   | 6.97988146  | 1.29250342  |
| C | 6.94448326   | 4.66983272  | -1.75350017 |
| C | -1.21146035  | -1.93417405 | -1.06571056 |
| C | -1.79080029  | -3.21448427 | -0.94501099 |
| C | -3.09959833  | -3.42855546 | -1.26962143 |
| C | -3.37787802  | -1.18759125 | -1.83955566 |
| C | -2.07558426  | -0.92016725 | -1.53153041 |
| H | -1.20492868  | -4.06196836 | -0.62172757 |
| H | -3.55595768  | -4.40618990 | -1.19864426 |
| H | -4.06309235  | -0.42266221 | -2.17713420 |
| H | -1.73345686  | 0.09960221  | -1.62650816 |
| C | -5.29994061  | -2.70736872 | -2.11990422 |
| H | -5.53552407  | -3.70136742 | -1.74207232 |
| H | -5.32395747  | -2.74831435 | -3.20965120 |
| C | 6.53852885   | 4.23275392  | -0.49231274 |
| C | -6.27653547  | -1.68861469 | -1.60029835 |
| C | -6.59328007  | -1.64263417 | -0.24557985 |
| C | -7.49877495  | -0.70861948 | 0.23047163  |
| C | -8.11306840  | 0.18430320  | -0.64560876 |
| C | -7.81598162  | 0.11862330  | -2.00321505 |
| C | -6.89572794  | -0.80151583 | -2.47623106 |
| H | -6.14285207  | -2.34855829 | 0.44397573  |
| H | -7.75161054  | -0.69605719 | 1.28243332  |
| H | -6.67671307  | -0.84469537 | -3.53773078 |
| H | -8.33331377  | 0.78762663  | -2.67855571 |
| C | -8.07624936  | 2.54048690  | 3.13784892  |
| C | -8.01803705  | 1.93588209  | 1.89115841  |
| H | -11.30302522 | 2.00350598  | 1.09093960  |
| H | -11.42072022 | 3.03811569  | 3.34504511  |
| H | -9.34486074  | 3.39233557  | 4.64229867  |
| H | -7.16535148  | 2.71435643  | 3.69729511  |
| H | -7.05725512  | 1.65455890  | 1.47878249  |

---

|   |              |             |             |
|---|--------------|-------------|-------------|
| C | 7.70205410   | -4.98334419 | 2.17196275  |
| O | 7.81683857   | -6.06728879 | 1.66591324  |
| N | -3.89193654  | -2.43003130 | -1.71274440 |
| C | -9.18594479  | 1.15365903  | -0.21714581 |
| O | -10.04958249 | 1.44321431  | -1.01325497 |
| H | 8.28687571   | -4.70608308 | 3.07179626  |

**Table S6.** Cartesian coordinates of optimized TPAPs3 calculated by the DFT, CAM-B3LYP/6-311G(d), Gaussian 09 program

| atom | x            | y           | z           |
|------|--------------|-------------|-------------|
| C    | -9.66832790  | -2.68792167 | -0.48409081 |
| C    | -10.75491464 | -3.50187010 | -0.80569743 |
| C    | -10.57807657 | -4.62171023 | -1.59862851 |
| C    | -9.30894040  | -4.95502131 | -2.05666827 |
| C    | 3.72359944   | 0.92952683  | 0.02562605  |
| C    | 4.61778792   | 0.62819025  | 1.04471866  |
| C    | 5.22478826   | -0.61765735 | 1.08543597  |
| C    | 4.94637560   | -1.58406261 | 0.12081725  |
| C    | 4.04663047   | -1.26640120 | -0.89543557 |
| C    | 3.44401680   | -0.01931793 | -0.95089674 |
| H    | 4.84290881   | 1.37211017  | 1.80027401  |
| H    | 5.92480617   | -0.84791449 | 1.88034523  |
| H    | 3.82742694   | -2.00403631 | -1.65898407 |
| H    | 2.75604318   | 0.22147158  | -1.75373704 |
| C    | 1.75076929   | 2.37842135  | 0.01028904  |
| C    | 1.12776652   | 3.56836368  | -0.41906214 |
| C    | -0.23750970  | 3.70107239  | -0.38283298 |
| C    | -1.07190558  | 2.67649166  | 0.09617073  |
| C    | -0.44265236  | 1.49524831  | 0.52532069  |
| C    | 0.91988639   | 1.33910257  | 0.47628846  |
| H    | 1.72977345   | 4.38502907  | -0.79207142 |
| H    | -0.65909348  | 4.64329745  | -0.71196326 |
| C    | 7.31964702   | -4.48362539 | -0.61452561 |
| H    | -1.03161520  | 0.65876105  | 0.88207848  |
| H    | 1.36186439   | 0.40987737  | 0.80736809  |
| C    | 3.99456925   | 3.35169275  | -0.12935832 |
| C    | 4.98098033   | 3.37191221  | -1.10921174 |
| C    | 5.85231550   | 4.44662438  | -1.18382236 |
| C    | 5.74200999   | 5.50572716  | -0.29094228 |
| C    | 4.75621500   | 5.47800976  | 0.69343558  |
| C    | 3.89174690   | 4.40529772  | 0.78074468  |
| H    | 5.06358819   | 2.54533647  | -1.80431185 |
| H    | 6.62165085   | 4.46353328  | -1.94924166 |
| N    | 3.11695674   | 2.22924069  | -0.03200369 |

---

|   |              |             |             |
|---|--------------|-------------|-------------|
| H | 4.69746846   | 6.30459727  | 1.39164583  |
| H | 3.13780014   | 4.36990996  | 1.55845740  |
| C | 6.82145971   | -5.44986986 | 0.25121826  |
| C | 5.10496121   | -3.90950315 | 1.03990054  |
| C | 5.73436967   | -5.19587754 | 1.07891283  |
| H | 7.29428440   | -6.42664507 | 0.28292587  |
| C | 6.70181607   | -3.19177424 | -0.65871681 |
| C | -2.51098759  | 2.83211174  | 0.14649285  |
| C | -3.19497816  | 3.78518879  | -0.63681044 |
| C | -4.55248904  | 3.91413697  | -0.56462337 |
| C | -4.68163249  | 2.20828210  | 1.01391998  |
| C | -3.32722614  | 2.04087696  | 0.98251040  |
| H | -2.66541931  | 4.41650113  | -1.33565935 |
| H | -5.09254612  | 4.63633180  | -1.16173130 |
| H | -5.32509568  | 1.61293125  | 1.64673001  |
| H | -2.89645751  | 1.30122018  | 1.64189425  |
| C | -6.76962849  | 3.34499744  | 0.35638580  |
| H | -7.05091637  | 3.97078071  | -0.48944421 |
| H | -6.95244468  | 3.91796820  | 1.26628203  |
| C | 5.59916483   | -2.92502052 | 0.16902321  |
| C | 8.92696857   | -3.79693215 | -2.29456221 |
| C | 8.32401771   | -2.50997976 | -2.33441559 |
| C | 7.25541898   | -2.21780099 | -1.54864034 |
| H | 8.89537425   | -5.73188635 | -1.41726025 |
| C | -7.55081784  | 2.06065109  | 0.36020978  |
| C | -7.67409841  | 1.30761013  | -0.80415722 |
| C | -8.39955835  | 0.12729564  | -0.80176586 |
| C | -9.02627450  | -0.31052711 | 0.36360377  |
| C | -8.92456690  | 0.45752611  | 1.51943468  |
| C | -8.18263891  | 1.62684882  | 1.52238063  |
| H | -7.21392365  | 1.64879736  | -1.72633946 |
| H | -8.50538443  | -0.43705781 | -1.71963543 |
| C | 8.43944762   | -4.74837903 | -1.45982273 |
| H | -8.11673142  | 2.21753352  | 2.43073400  |
| C | 3.98069768   | -3.69163508 | 1.89765820  |
| H | -9.45232907  | 0.13152091  | 2.40694176  |
| C | -8.21825936  | -4.16601250 | -1.71982221 |
| C | -8.39672111  | -3.03143146 | -0.94239387 |
| H | -11.73234640 | -3.24050103 | -0.41947513 |
| H | -11.42855992 | -5.24248642 | -1.85488865 |
| H | -9.16941403  | -5.83711679 | -2.67119211 |
| H | -7.22569065  | -4.43788171 | -2.06013413 |
| H | -7.53632013  | -2.43283181 | -0.66739527 |
| C | 6.66771531   | 6.66078531  | -0.37298151 |

---

|   |              |             |             |
|---|--------------|-------------|-------------|
| O | 6.61641062   | 7.61369092  | 0.35708788  |
| N | -5.29629452  | 3.13620663  | 0.24948508  |
| C | -9.91800114  | -1.52553523 | 0.41387453  |
| O | -10.84405624 | -1.52666029 | 1.19231898  |
| H | 7.43457220   | 6.59761065  | -1.17118344 |
| H | 9.77860849   | -4.00919158 | -2.93055950 |
| H | 8.72866199   | -1.75495239 | -2.99923420 |
| H | 6.81418194   | -1.22988012 | -1.58683279 |
| C | 3.52995467   | -4.66658818 | 2.72903410  |
| C | 4.16276567   | -5.93909708 | 2.76929956  |
| C | 5.22776227   | -6.19152394 | 1.96809805  |
| H | 3.48579313   | -2.72877407 | 1.87944375  |
| H | 2.67772764   | -4.47749218 | 3.37254325  |
| H | 3.78872711   | -6.70274732 | 3.44151516  |
| H | 5.71704192   | -7.15959958 | 1.98895459  |

**Table S7.** Cartesian coordinates of optimized TPAPs4 calculated by the DFT, CAM-B3LYP/6-311G(d), Gaussian 09 program

| atom | x            | y           | z           |
|------|--------------|-------------|-------------|
| C    | -10.48325965 | -1.71283063 | -0.60486765 |
| C    | -11.65857354 | -2.37901291 | -0.95347819 |
| C    | -11.60860888 | -3.52468828 | -1.72740069 |
| C    | -10.38183320 | -4.03186742 | -2.13896908 |
| C    | 3.22339576   | 0.06157291  | 0.28257300  |
| C    | 4.00662967   | -0.44169156 | 1.31293937  |
| C    | 4.42070097   | -1.76462288 | 1.28263414  |
| C    | 4.05582286   | -2.60699374 | 0.23424602  |
| C    | 3.26686125   | -2.08715481 | -0.79086761 |
| C    | 2.85762292   | -0.76293884 | -0.77478926 |
| H    | 4.29734622   | 0.20478863  | 2.13311227  |
| H    | 5.03603374   | -2.15346040 | 2.08575671  |
| H    | 2.98330876   | -2.72774433 | -1.61807847 |
| H    | 2.25691477   | -0.36503016 | -1.58512889 |
| C    | 1.48662367   | 1.78569582  | 0.29799457  |
| C    | 1.05485012   | 3.05979069  | -0.11960930 |
| C    | -0.28055973  | 3.37964160  | -0.13712522 |
| C    | -1.26659234  | 2.46828723  | 0.27459807  |
| C    | -0.82720449  | 1.20255037  | 0.69596674  |
| C    | 0.50293025   | 0.86128513  | 0.69947532  |
| H    | 1.77920255   | 3.79239218  | -0.44736901 |
| H    | -0.55532429  | 4.37763215  | -0.45737410 |
| C    | 6.03538749   | -5.75931906 | -0.61375473 |
| H    | -1.54195191  | 0.44763521  | 1.00128086  |
| H    | 0.79910655   | -0.12821446 | 1.01863739  |

---

|   |             |             |             |
|---|-------------|-------------|-------------|
| C | 3.85596446  | 2.41720015  | 0.29166704  |
| C | 4.91598128  | 2.29870682  | -0.60455127 |
| C | 5.94223473  | 3.22267000  | -0.60763404 |
| C | 5.94018226  | 4.29808296  | 0.29063281  |
| C | 4.87669518  | 4.39258140  | 1.19766294  |
| C | 3.84951480  | 3.46974435  | 1.20419067  |
| H | 4.93487498  | 1.47236010  | -1.30418299 |
| H | 6.74404357  | 3.09671343  | -1.32040950 |
| N | 2.82158466  | 1.44072246  | 0.29833231  |
| H | 4.86404966  | 5.20047770  | 1.92113859  |
| H | 3.04733793  | 3.55403781  | 1.92738091  |
| C | 5.34579085  | -6.70546030 | 0.13505160  |
| C | 3.81650634  | -4.99427379 | 0.95594478  |
| C | 4.25156167  | -6.35870098 | 0.91855050  |
| H | 5.67112976  | -7.74088275 | 0.10861507  |
| C | 5.61256508  | -4.39084478 | -0.58094848 |
| C | -2.67472007 | 2.81699205  | 0.26065220  |
| C | -3.18626721 | 3.84980307  | -0.55065692 |
| C | -4.51715894 | 4.15802900  | -0.54249139 |
| C | -4.94610505 | 2.48970463  | 1.02309185  |
| C | -3.62510883 | 2.14401503  | 1.05529653  |
| H | -2.54427878 | 4.40140581  | -1.22239905 |
| H | -4.92824060 | 4.94299524  | -1.16265914 |
| H | -5.69232538 | 1.98731527  | 1.62278314  |
| H | -3.32655006 | 1.35607429  | 1.73184593  |
| C | -6.83158663 | 3.89205222  | 0.26875906  |
| H | -6.98976332 | 4.52928700  | -0.60013199 |
| H | -6.97396648 | 4.50533850  | 1.15936140  |
| C | 4.50498289  | -4.02963854 | 0.20311329  |
| C | 7.83580810  | -5.18927839 | -2.13385397 |
| C | 7.42612055  | -3.82832781 | -2.09705826 |
| C | 6.35840872  | -3.44342769 | -1.35102899 |
| H | 7.46900941  | -7.16046130 | -1.43049368 |
| C | -7.77646775 | 2.72337602  | 0.25972319  |
| C | -7.96041378 | 1.97519824  | -0.89978215 |
| C | -8.83684344 | 0.90214505  | -0.90955100 |
| C | -9.55463576 | 0.57008421  | 0.23802218  |
| C | -9.38959738 | 1.33583160  | 1.38813687  |
| C | -8.49889359 | 2.39601911  | 1.40398400  |
| H | -7.42900578 | 2.23787600  | -1.80928635 |
| H | -8.98691133 | 0.34278985  | -1.82429768 |
| C | 8.37619845  | 4.83547517  | -1.58992625 |
| C | 7.16164178  | -6.12018201 | -1.41365735 |
| H | -8.38556759 | 2.98737168  | 2.30722756  |

---

|   |              |             |             |
|---|--------------|-------------|-------------|
| C | 6.96604163   | 5.32790842  | 0.36896028  |
| H | 6.84870710   | 6.01378643  | 1.20205562  |
| C | 2.67945467   | -4.67934371 | 1.76526967  |
| C | 8.02878994   | 5.58366015  | -0.42288089 |
| N | 8.65331090   | 4.23432870  | -2.52809580 |
| H | -9.98579604  | 1.09725785  | 2.25997480  |
| C | 8.88650656   | 6.68667134  | -0.10916385 |
| N | 9.56477008   | 7.57517560  | 0.15175180  |
| C | -9.20629605  | -3.39071612 | -1.77472800 |
| C | -9.25537073  | -2.23049499 | -1.01649668 |
| H | -12.60384661 | -1.98323327 | -0.60325114 |
| H | -12.52616038 | -4.03001945 | -2.00500231 |
| H | -10.34258528 | -4.93414056 | -2.73858274 |
| H | -8.24898318  | -3.79824813 | -2.07865606 |
| H | -8.33149679  | -1.74831546 | -0.71948399 |
| N | -5.39443383  | 3.48783222  | 0.23295538  |
| C | -10.60304791 | -0.51376570 | 0.27090582  |
| O | -11.54540406 | -0.37771803 | 1.01716555  |
| H | 8.69039395   | -5.47477352 | -2.73629046 |
| H | 7.97841957   | -3.09219699 | -2.67038160 |
| H | 6.06588557   | -2.40123786 | -1.32992338 |
| C | 2.03809249   | -5.63838454 | 2.48209802  |
| C | 2.47779597   | -6.98996054 | 2.44673285  |
| C | 3.54800160   | -7.33432587 | 1.68776794  |
| H | 2.33012558   | -3.65509886 | 1.80333741  |
| H | 1.17999732   | -5.37569053 | 3.09108819  |
| H | 1.95324489   | -7.73972596 | 3.02777951  |
| H | 3.89111195   | -8.36290229 | 1.65185645  |

**Table S8.** Cartesian coordinates of optimized TPAPs5 calculated by the DFT, CAM-B3LYP/6-311G(d), Gaussian 09 program

| atom | x           | y           | z           |
|------|-------------|-------------|-------------|
| C    | -0.24247687 | -0.07514419 | -0.14392643 |
| N    | -1.31964993 | 0.78517649  | -0.13940065 |
| C    | -1.12748020 | 2.20363926  | -0.03485331 |
| C    | -2.66035301 | 0.31120362  | -0.22139267 |
| C    | -1.70210143 | 2.90525040  | 1.01726615  |
| C    | -1.53567122 | 4.27881064  | 1.10471748  |
| C    | -0.78902944 | 4.97406926  | 0.15516656  |
| C    | -0.21826254 | 4.25552675  | -0.89427533 |
| C    | -0.38985248 | 2.88380583  | -0.99677843 |
| C    | -3.55730871 | 0.90155871  | -1.10492286 |
| C    | -4.86695405 | 0.45842164  | -1.16057325 |
| C    | -5.31492230 | -0.59230461 | -0.35642198 |

---

|   |             |             |             |
|---|-------------|-------------|-------------|
| C | -4.40616510 | -1.16097837 | 0.54368537  |
| C | -3.10334597 | -0.71259966 | 0.61659901  |
| C | -0.35050630 | -1.38486995 | -0.65173745 |
| C | 0.73085890  | -2.23094110 | -0.65480528 |
| C | 1.97884734  | -1.84095266 | -0.14173138 |
| C | 2.07911730  | -0.53293572 | 0.36031472  |
| C | 1.01187141  | 0.33120570  | 0.35174409  |
| C | -0.60752408 | 6.45160032  | 0.25548540  |
| C | 3.10928352  | -2.74967128 | -0.12711212 |
| C | -1.37376378 | 7.30369619  | -0.55657058 |
| C | -1.18955660 | 8.72128017  | -0.46124017 |
| C | -0.26051766 | 9.23056883  | 0.43805646  |
| C | 0.49966890  | 8.39788779  | 1.25045283  |
| C | 0.32897605  | 6.97832859  | 1.15997362  |
| C | 1.45177736  | 8.92703053  | 2.17355307  |
| C | 2.19618569  | 8.10892859  | 2.95861305  |
| C | 2.03730839  | 6.69917489  | 2.86621416  |
| C | 1.14212947  | 6.15508993  | 2.00160060  |
| C | -2.35460037 | 6.81985112  | -1.47909959 |
| C | -3.07830808 | 7.67350933  | -2.24872707 |
| C | -2.88333096 | 9.07889419  | -2.15864138 |
| C | -1.97023332 | 9.58191273  | -1.29095405 |
| C | 3.19097899  | -3.86419322 | -0.98636274 |
| C | 4.26347963  | -4.70912677 | -0.94407007 |
| N | 5.28769465  | -4.51128468 | -0.08837104 |
| C | 5.25118648  | -3.45291525 | 0.74837781  |
| C | 4.20072397  | -2.57998431 | 0.74914172  |
| C | 6.41114493  | -5.49253572 | -0.01811652 |
| C | 7.76013390  | -4.84186529 | 0.10633132  |
| C | 8.32970833  | -4.18751152 | -0.98246587 |
| C | 9.57634488  | -3.59360836 | -0.86926731 |
| C | 10.27951418 | -3.65837866 | 0.33230644  |
| C | 9.72034391  | -4.33632798 | 1.41124866  |
| C | 8.46577408  | -4.91274934 | 1.30443071  |
| C | 11.68262872 | -3.13024004 | 0.49665596  |
| C | 12.14796184 | -1.95351781 | -0.28964741 |
| O | 12.42023407 | -3.69261617 | 1.27323556  |
| C | 13.51710277 | -1.83838756 | -0.53221795 |
| C | 14.01532125 | -0.74488147 | -1.21783606 |
| C | 13.15375089 | 0.25845932  | -1.64513611 |
| C | 11.79386283 | 0.16522924  | -1.38508252 |
| C | 11.28983844 | -0.94026285 | -0.71625888 |
| C | -6.69775527 | -1.04940892 | -0.48118771 |
| C | -7.18078975 | -2.20060629 | 0.00989972  |

---



---

|   |              |             |             |
|---|--------------|-------------|-------------|
| C | -8.53282507  | -2.68626352 | -0.09164006 |
| C | -8.94399130  | -3.87853513 | 0.40694470  |
| C | -10.36228729 | -4.03926646 | 0.13044595  |
| O | -10.79421690 | -2.96031025 | -0.51925960 |
| C | -9.71959650  | -2.00364554 | -0.73639252 |
| C | -9.59001766  | -1.84430646 | -2.24604867 |
| C | -10.13813945 | -0.71826250 | -0.03478113 |
| C | -11.21598371 | -5.05528149 | 0.42323335  |
| C | -8.08517637  | -4.78718110 | 1.08105643  |
| N | -7.30867802  | -5.44885246 | 1.60811653  |
| C | -12.58118047 | -4.95792868 | 0.02829886  |
| N | -13.68130245 | -4.87839827 | -0.29157328 |
| C | -10.79416197 | -6.22549945 | 1.11295740  |
| N | -10.47283152 | -7.17890831 | 1.66750371  |
| H | -2.28374233  | 2.37547305  | 1.76297472  |
| H | -1.98787834  | 4.82306510  | 1.92584227  |
| H | 0.35779077   | 4.78290984  | -1.64604809 |
| H | 0.04812186   | 2.33733409  | -1.82464096 |
| H | -3.22758095  | 1.71096808  | -1.74463770 |
| H | -5.55291215  | 0.92765285  | -1.85771138 |
| H | -4.72515626  | -1.94195903 | 1.22306504  |
| H | -2.42246154  | -1.14778705 | 1.33840049  |
| H | -1.29306592  | -1.72883875 | -1.05418037 |
| H | 0.58539344   | -3.23212966 | -1.04260214 |
| H | 3.02269494   | -0.16414456 | 0.74457227  |
| H | 1.13407263   | 1.33289249  | 0.73951704  |
| H | -0.12627006  | 10.30556129 | 0.50861326  |
| H | 1.56669308   | 10.00414558 | 2.23329885  |
| H | 2.91451931   | 8.52285268  | 3.65685224  |
| H | 2.64094851   | 6.05509279  | 3.49621060  |
| H | 1.03661900   | 5.07909995  | 1.94344686  |
| H | -2.52263633  | 5.75309657  | -1.55605243 |
| H | -3.81778754  | 7.28392512  | -2.93957135 |
| H | -3.47082526  | 9.74233027  | -2.78274409 |
| H | -1.81732541  | 10.65285773 | -1.20960324 |
| H | 2.42205103   | -4.06110302 | -1.71953537 |
| H | 4.34468607   | -5.56650042 | -1.59836401 |
| H | 6.09760297   | -3.34290955 | 1.41192957  |
| H | 4.21847232   | -1.77112718 | 1.46545136  |
| H | 6.34862481   | -6.09155834 | -0.92550723 |
| H | 6.21359608   | -6.15177823 | 0.82802561  |
| H | 7.80631885   | -4.15185907 | -1.93292746 |
| H | 10.01707719  | -3.10737771 | -1.73036572 |
| H | 10.29463484  | -4.41966645 | 2.32542375  |

---

---

|   |              |             |             |
|---|--------------|-------------|-------------|
| H | 8.04539256   | -5.44287614 | 2.15331224  |
| H | 14.17641333  | -2.61760321 | -0.17030847 |
| H | 15.07836330  | -0.66806027 | -1.41372585 |
| H | 13.54549012  | 1.11913391  | -2.17519961 |
| H | 11.12521441  | 0.95794518  | -1.70041188 |
| H | 10.22948047  | -0.99454830 | -0.49956404 |
| H | -7.34995983  | -0.38652273 | -1.03955971 |
| H | -6.50792965  | -2.87170449 | 0.53373235  |
| H | -8.84388239  | -1.09445903 | -2.50720174 |
| H | -9.30992239  | -2.78897993 | -2.71264584 |
| H | -10.55059724 | -1.53082206 | -2.65486559 |
| H | -9.40613708  | 0.07477827  | -0.18586689 |
| H | -11.09559361 | -0.38626966 | -0.43633679 |
| H | -10.25330483 | -0.88243421 | 1.03679444  |

---

**Table S9.** Calculated SOCME between triplets and singlets of TPAPs1

| CALCULATED SOCME BETWEEN TRIPLETS AND SINGLETs |   |                 |                         |                  |  |
|------------------------------------------------|---|-----------------|-------------------------|------------------|--|
| Root                                           |   | Z               | <T HSO S> (Re, Im) cm-1 |                  |  |
| T                                              | S |                 | X                       | Y                |  |
| 1                                              | 0 | ( 0.00, -0.00)  | ( 0.00, 0.48)           | ( -0.00, -0.36)  |  |
| 1                                              | 1 | ( 0.00, 0.03)   | ( 0.00, 0.49)           | ( -0.00, -0.07)  |  |
| 1                                              | 2 | ( 0.00, 0.24)   | ( 0.00, -0.20)          | ( -0.00, -0.02)  |  |
| 1                                              | 3 | ( 0.00, 3.18)   | ( 0.00, 2.38)           | ( -0.00, 5.05)   |  |
| 1                                              | 4 | ( 0.00, 0.20)   | ( 0.00, -0.02)          | ( -0.00, -0.13)  |  |
| 1                                              | 5 | ( 0.00, 0.07)   | ( 0.00, -0.05)          | ( -0.00, -0.04)  |  |
| 2                                              | 0 | ( 0.00, 7.51)   | ( 0.00, -8.25)          | ( -0.00, 3.45)   |  |
| 2                                              | 1 | ( 0.00, -0.19)  | ( 0.00, -0.09)          | ( -0.00, 0.07)   |  |
| 2                                              | 2 | ( 0.00, 0.22)   | ( 0.00, -0.07)          | ( -0.00, -0.14)  |  |
| 2                                              | 3 | ( 0.00, -0.52)  | ( 0.00, -0.45)          | ( -0.00, -0.91)  |  |
| 2                                              | 4 | ( 0.00, -0.01)  | ( 0.00, 0.11)           | ( -0.00, -0.02)  |  |
| 2                                              | 5 | ( 0.00, -0.06)  | ( 0.00, 0.10)           | ( -0.00, -0.04)  |  |
| 3                                              | 0 | ( 0.00, -15.77) | ( 0.00, -19.00)         | ( -0.00, -28.19) |  |
| 3                                              | 1 | ( 0.00, 3.39)   | ( 0.00, 2.59)           | ( -0.00, 5.56)   |  |
| 3                                              | 2 | ( 0.00, 0.14)   | ( 0.00, 0.03)           | ( -0.00, 0.06)   |  |
| 3                                              | 3 | ( 0.00, -0.02)  | ( 0.00, 0.17)           | ( -0.00, 0.37)   |  |
| 3                                              | 4 | ( 0.00, -0.03)  | ( 0.00, -0.02)          | ( -0.00, -0.06)  |  |
| 3                                              | 5 | ( 0.00, 0.01)   | ( 0.00, 0.06)           | ( -0.00, 0.04)   |  |
| 4                                              | 0 | ( 0.00, 24.54)  | ( 0.00, -28.56)         | ( -0.00, 12.53)  |  |
| 4                                              | 1 | ( 0.00, -0.28)  | ( 0.00, -0.62)          | ( -0.00, -0.52)  |  |
| 4                                              | 2 | ( 0.00, 0.74)   | ( 0.00, -0.16)          | ( -0.00, -0.46)  |  |
| 4                                              | 3 | ( 0.00, 0.10)   | ( 0.00, 0.08)           | ( -0.00, 0.14)   |  |
| 4                                              | 4 | ( 0.00, 0.03)   | ( 0.00, -0.07)          | ( -0.00, -0.00)  |  |
| 4                                              | 5 | ( 0.00, -0.20)  | ( 0.00, 0.36)           | ( -0.00, -0.12)  |  |
| 5                                              | 0 | ( 0.00, 4.78)   | ( 0.00, -6.50)          | ( -0.00, 1.68)   |  |
| 5                                              | 1 | ( 0.00, -0.16)  | ( 0.00, -0.07)          | ( -0.00, -0.16)  |  |
| 5                                              | 2 | ( 0.00, 0.15)   | ( 0.00, 0.14)           | ( -0.00, -0.12)  |  |
| 5                                              | 3 | ( 0.00, 2.36)   | ( 0.00, 2.04)           | ( -0.00, 4.03)   |  |
| 5                                              | 4 | ( 0.00, 0.10)   | ( 0.00, -0.05)          | ( -0.00, -0.01)  |  |
| 5                                              | 5 | ( 0.00, 1.19)   | ( 0.00, -1.17)          | ( -0.00, 0.00)   |  |

**Table S10.** Calculated SOCME between triplets and singlets of TPAPs2

| CALCULATED SOCME BETWEEN TRIPLETS AND SINGLETs |   |                |                         |                  |  |
|------------------------------------------------|---|----------------|-------------------------|------------------|--|
| Root                                           |   | Z              | <T HSO S> (Re, Im) cm-1 |                  |  |
| T                                              | S |                | X                       | Y                |  |
| 1                                              | 0 | ( 0.00, 0.05)  | ( 0.00, -0.27)          | ( -0.00, 0.05)   |  |
| 1                                              | 1 | ( 0.00, 0.02)  | ( 0.00, -0.17)          | ( -0.00, 0.48)   |  |
| 1                                              | 2 | ( 0.00, -0.04) | ( 0.00, -0.15)          | ( -0.00, 0.99)   |  |
| 1                                              | 3 | ( 0.00, 0.07)  | ( 0.00, -0.09)          | ( -0.00, -0.03)  |  |
| 1                                              | 4 | ( 0.00, -0.03) | ( 0.00, 0.01)           | ( -0.00, -0.15)  |  |
| 1                                              | 5 | ( 0.00, 0.18)  | ( 0.00, 0.17)           | ( -0.00, 0.10)   |  |
| 2                                              | 0 | ( 0.00, -0.03) | ( 0.00, -0.03)          | ( -0.00, 1.24)   |  |
| 2                                              | 1 | ( 0.00, 0.10)  | ( 0.00, 0.20)           | ( -0.00, -0.79)  |  |
| 2                                              | 2 | ( 0.00, -0.19) | ( 0.00, -0.16)          | ( -0.00, 0.57)   |  |
| 2                                              | 3 | ( 0.00, 0.23)  | ( 0.00, 0.15)           | ( -0.00, 0.03)   |  |
| 2                                              | 4 | ( 0.00, -0.02) | ( 0.00, -0.00)          | ( -0.00, -0.04)  |  |
| 2                                              | 5 | ( 0.00, -0.09) | ( 0.00, -0.15)          | ( -0.00, -0.10)  |  |
| 3                                              | 0 | ( 0.00, -0.04) | ( 0.00, -0.21)          | ( -0.00, 0.71)   |  |
| 3                                              | 1 | ( 0.00, 0.01)  | ( 0.00, -0.00)          | ( -0.00, 0.17)   |  |
| 3                                              | 2 | ( 0.00, 0.01)  | ( 0.00, -0.03)          | ( -0.00, -0.11)  |  |
| 3                                              | 3 | ( 0.00, -0.00) | ( 0.00, 0.00)           | ( -0.00, -0.00)  |  |
| 3                                              | 4 | ( 0.00, 0.00)  | ( 0.00, -0.05)          | ( -0.00, 0.07)   |  |
| 3                                              | 5 | ( 0.00, -0.01) | ( 0.00, -0.00)          | ( -0.00, -0.01)  |  |
| 4                                              | 0 | ( 0.00, 4.08)  | ( 0.00, -1.44)          | ( -0.00, -9.62)  |  |
| 4                                              | 1 | ( 0.00, -0.70) | ( 0.00, 0.21)           | ( -0.00, 1.14)   |  |
| 4                                              | 2 | ( 0.00, 0.48)  | ( 0.00, -0.42)          | ( -0.00, -1.45)  |  |
| 4                                              | 3 | ( 0.00, 0.00)  | ( 0.00, -0.00)          | ( -0.00, 0.01)   |  |
| 4                                              | 4 | ( 0.00, 0.00)  | ( 0.00, -0.00)          | ( -0.00, -0.00)  |  |
| 4                                              | 5 | ( 0.00, -0.02) | ( 0.00, 0.00)           | ( -0.00, 0.04)   |  |
| 5                                              | 0 | ( 0.00, 14.63) | ( 0.00, -4.28)          | ( -0.00, -33.44) |  |
| 5                                              | 1 | ( 0.00, -1.69) | ( 0.00, 0.77)           | ( -0.00, 3.93)   |  |
| 5                                              | 2 | ( 0.00, 2.22)  | ( 0.00, -0.84)          | ( -0.00, -4.92)  |  |
| 5                                              | 3 | ( 0.00, 0.00)  | ( 0.00, 0.00)           | ( -0.00, 0.01)   |  |
| 5                                              | 4 | ( 0.00, 0.00)  | ( 0.00, -0.00)          | ( -0.00, -0.01)  |  |
| 5                                              | 5 | ( 0.00, -0.08) | ( 0.00, 0.02)           | ( -0.00, 0.16)   |  |

**Table S11.** Calculated SOCME between triplets and singlets of TPAPs3

| CALCULATED SOCME BETWEEN TRIPLETS AND SINGLETs |   |                         |                |                 |  |
|------------------------------------------------|---|-------------------------|----------------|-----------------|--|
| Root                                           |   | <T HSO S> (Re, Im) cm-1 |                |                 |  |
| T                                              | S | Z                       | X              | Y               |  |
| 1                                              | 0 | ( 0.00, -0.00)          | ( 0.00, 0.09)  | ( -0.00, 0.15)  |  |
| 1                                              | 1 | ( 0.00, 0.00)           | ( 0.00, 0.01)  | ( -0.00, 0.01)  |  |
| 1                                              | 2 | ( 0.00, -0.21)          | ( 0.00, -0.01) | ( -0.00, -0.20) |  |
| 1                                              | 3 | ( 0.00, -0.01)          | ( 0.00, 0.01)  | ( -0.00, 0.09)  |  |
| 1                                              | 4 | ( 0.00, -0.01)          | ( 0.00, -0.04) | ( -0.00, 0.03)  |  |
| 1                                              | 5 | ( 0.00, -1.46)          | ( 0.00, -0.12) | ( -0.00, -1.14) |  |
| 2                                              | 0 | ( 0.00, -0.11)          | ( 0.00, -0.56) | ( -0.00, 0.00)  |  |
| 2                                              | 1 | ( 0.00, 0.01)           | ( 0.00, -0.06) | ( -0.00, -0.11) |  |
| 2                                              | 2 | ( 0.00, -0.01)          | ( 0.00, -0.00) | ( -0.00, -0.00) |  |
| 2                                              | 3 | ( 0.00, -0.02)          | ( 0.00, 0.46)  | ( -0.00, 0.23)  |  |
| 2                                              | 4 | ( 0.00, -0.08)          | ( 0.00, 0.03)  | ( -0.00, 0.01)  |  |
| 2                                              | 5 | ( 0.00, -0.07)          | ( 0.00, -0.01) | ( -0.00, -0.05) |  |
| 3                                              | 0 | ( 0.00, 0.02)           | ( 0.00, 0.04)  | ( -0.00, 0.11)  |  |
| 3                                              | 1 | ( 0.00, -0.01)          | ( 0.00, 0.08)  | ( -0.00, 0.15)  |  |
| 3                                              | 2 | ( 0.00, 0.04)           | ( 0.00, 0.02)  | ( -0.00, 0.02)  |  |
| 3                                              | 3 | ( 0.00, -0.01)          | ( 0.00, -0.00) | ( -0.00, -0.02) |  |
| 3                                              | 4 | ( 0.00, -0.02)          | ( 0.00, 0.01)  | ( -0.00, -0.01) |  |
| 3                                              | 5 | ( 0.00, 0.02)           | ( 0.00, 0.00)  | ( -0.00, 0.01)  |  |
| 4                                              | 0 | ( 0.00, -0.02)          | ( 0.00, -0.04) | ( -0.00, 0.04)  |  |
| 4                                              | 1 | ( 0.00, -0.21)          | ( 0.00, -0.01) | ( -0.00, -0.20) |  |
| 4                                              | 2 | ( 0.00, 0.00)           | ( 0.00, -0.00) | ( -0.00, -0.00) |  |
| 4                                              | 3 | ( 0.00, 0.00)           | ( 0.00, -0.00) | ( -0.00, 0.01)  |  |
| 4                                              | 4 | ( 0.00, 0.00)           | ( 0.00, -0.00) | ( -0.00, 0.00)  |  |
| 4                                              | 5 | ( 0.00, -0.17)          | ( 0.00, -0.57) | ( -0.00, -0.11) |  |
| 5                                              | 0 | ( 0.00, -0.01)          | ( 0.00, -0.05) | ( -0.00, 0.01)  |  |
| 5                                              | 1 | ( 0.00, -0.01)          | ( 0.00, -0.04) | ( -0.00, 0.03)  |  |
| 5                                              | 2 | ( 0.00, -0.00)          | ( 0.00, 0.00)  | ( -0.00, -0.00) |  |
| 5                                              | 3 | ( 0.00, -0.12)          | ( 0.00, 0.06)  | ( -0.00, -0.02) |  |
| 5                                              | 4 | ( 0.00, -0.01)          | ( 0.00, 0.00)  | ( -0.00, -0.00) |  |
| 5                                              | 5 | ( 0.00, -0.00)          | ( 0.00, -0.00) | ( -0.00, -0.00) |  |

**Table S12.** Calculated SOCME between triplets and singlets of TPAPs4

| CALCULATED SOCME BETWEEN TRIPLETS AND SINGLETs |   |                         |                |                 |  |
|------------------------------------------------|---|-------------------------|----------------|-----------------|--|
| Root                                           |   | <T HSO S> (Re, Im) cm-1 |                |                 |  |
| T                                              | S | Z                       | X              | Y               |  |
| 1                                              | 0 | ( 0.00, -0.01)          | ( 0.00, 0.06)  | ( -0.00, 0.12)  |  |
| 1                                              | 1 | ( 0.00, 0.00)           | ( 0.00, 0.00)  | ( -0.00, 0.01)  |  |
| 1                                              | 2 | ( 0.00, 0.18)           | ( 0.00, -0.31) | ( -0.00, 0.32)  |  |
| 1                                              | 3 | ( 0.00, -0.12)          | ( 0.00, -0.03) | ( -0.00, -0.10) |  |
| 1                                              | 4 | ( 0.00, -0.00)          | ( 0.00, 0.00)  | ( -0.00, 0.08)  |  |
| 1                                              | 5 | ( 0.00, -0.01)          | ( 0.00, -0.04) | ( -0.00, 0.05)  |  |
| 2                                              | 0 | ( 0.00, -0.07)          | ( 0.00, -0.64) | ( -0.00, -0.08) |  |
| 2                                              | 1 | ( 0.00, 0.00)           | ( 0.00, -0.03) | ( -0.00, -0.10) |  |
| 2                                              | 2 | ( 0.00, 0.00)           | ( 0.00, -0.00) | ( -0.00, 0.00)  |  |
| 2                                              | 3 | ( 0.00, -0.00)          | ( 0.00, -0.00) | ( -0.00, -0.00) |  |
| 2                                              | 4 | ( 0.00, 0.03)           | ( 0.00, 0.40)  | ( -0.00, 0.16)  |  |
| 2                                              | 5 | ( 0.00, -0.07)          | ( 0.00, 0.07)  | ( -0.00, 0.01)  |  |
| 3                                              | 0 | ( 0.00, -0.00)          | ( 0.00, 0.03)  | ( -0.00, 0.11)  |  |
| 3                                              | 1 | ( 0.00, -0.01)          | ( 0.00, 0.04)  | ( -0.00, 0.15)  |  |
| 3                                              | 2 | ( 0.00, -0.03)          | ( 0.00, -0.06) | ( -0.00, -0.22) |  |
| 3                                              | 3 | ( 0.00, 0.03)           | ( 0.00, 0.00)  | ( -0.00, -0.01) |  |
| 3                                              | 4 | ( 0.00, -0.01)          | ( 0.00, 0.00)  | ( -0.00, -0.01) |  |
| 3                                              | 5 | ( 0.00, -0.02)          | ( 0.00, 0.01)  | ( -0.00, -0.01) |  |
| 4                                              | 0 | ( 0.00, 0.02)           | ( 0.00, 0.06)  | ( -0.00, 0.24)  |  |
| 4                                              | 1 | ( 0.00, 0.18)           | ( 0.00, -0.31) | ( -0.00, 0.31)  |  |
| 4                                              | 2 | ( 0.00, 0.00)           | ( 0.00, 0.00)  | ( -0.00, 0.01)  |  |
| 4                                              | 3 | ( 0.00, 0.05)           | ( 0.00, 0.06)  | ( -0.00, 0.11)  |  |
| 4                                              | 4 | ( 0.00, -0.03)          | ( 0.00, 0.02)  | ( -0.00, -0.01) |  |
| 4                                              | 5 | ( 0.00, -0.00)          | ( 0.00, 0.00)  | ( -0.00, -0.00) |  |
| 5                                              | 0 | ( 0.00, 0.03)           | ( 0.00, 0.03)  | ( -0.00, -0.08) |  |
| 5                                              | 1 | ( 0.00, 0.12)           | ( 0.00, 0.03)  | ( -0.00, 0.10)  |  |
| 5                                              | 2 | ( 0.00, 0.05)           | ( 0.00, 0.06)  | ( -0.00, 0.11)  |  |
| 5                                              | 3 | ( 0.00, 0.00)           | ( 0.00, 0.00)  | ( -0.00, 0.00)  |  |
| 5                                              | 4 | ( 0.00, 0.00)           | ( 0.00, -0.00) | ( -0.00, -0.00) |  |
| 5                                              | 5 | ( 0.00, 0.00)           | ( 0.00, 0.00)  | ( -0.00, 0.00)  |  |



**Table S13.** Calculated SOCME between triplets and singlets of TPAPs5

| CALCULATED SOCME BETWEEN TRIPLETS AND SINGLETS |   |                |                                     |                 |  |
|------------------------------------------------|---|----------------|-------------------------------------|-----------------|--|
| Root                                           |   | Z              | <T HSO S> (Re, Im) cm <sup>-1</sup> |                 |  |
| T                                              | S |                | X                                   | Y               |  |
| 1                                              | 0 | ( 0.00, -0.01) | ( 0.13, 0.01)                       | ( 0.13, -0.01)  |  |
| 1                                              | 1 | ( 0.00, -0.00) | ( 0.01, -0.00)                      | ( 0.01, 0.00)   |  |
| 1                                              | 2 | ( 0.00, 0.13)  | ( -0.06, 0.17)                      | ( -0.06, -0.17) |  |
| 1                                              | 3 | ( 0.00, -0.01) | ( -0.05, 0.03)                      | ( -0.05, -0.03) |  |
| 1                                              | 4 | ( 0.00, 0.16)  | ( -0.09, 0.03)                      | ( -0.09, -0.03) |  |
| 1                                              | 5 | ( 0.00, 0.00)  | ( 0.05, -0.01)                      | ( 0.05, 0.01)   |  |
| 2                                              | 0 | ( 0.00, -0.07) | ( 0.19, 0.23)                       | ( 0.19, -0.23)  |  |
| 2                                              | 1 | ( 0.00, 0.00)  | ( 0.08, -0.00)                      | ( 0.08, 0.00)   |  |
| 2                                              | 2 | ( 0.00, -0.01) | ( -0.01, -0.00)                     | ( -0.01, 0.00)  |  |
| 2                                              | 3 | ( 0.00, 0.05)  | ( 0.05, 0.23)                       | ( 0.05, -0.23)  |  |
| 2                                              | 4 | ( 0.00, -0.00) | ( 0.00, 0.00)                       | ( 0.00, -0.00)  |  |
| 2                                              | 5 | ( 0.00, 0.03)  | ( -0.14, 0.07)                      | ( -0.14, -0.07) |  |
| 3                                              | 0 | ( 0.00, -0.03) | ( -0.17, -0.24)                     | ( -0.17, 0.24)  |  |
| 3                                              | 1 | ( 0.00, 0.01)  | ( -0.06, 0.01)                      | ( -0.06, -0.01) |  |
| 3                                              | 2 | ( 0.00, -0.01) | ( -0.03, 0.01)                      | ( -0.03, -0.01) |  |
| 3                                              | 3 | ( 0.00, 0.08)  | ( -0.10, -0.06)                     | ( -0.10, 0.06)  |  |
| 3                                              | 4 | ( 0.00, 0.01)  | ( -0.00, -0.00)                     | ( -0.00, 0.00)  |  |
| 3                                              | 5 | ( 0.00, -0.04) | ( 0.13, 0.04)                       | ( 0.13, -0.04)  |  |
| 4                                              | 0 | ( 0.00, -0.01) | ( 0.10, -0.02)                      | ( 0.10, 0.02)   |  |
| 4                                              | 1 | ( 0.00, -0.01) | ( 0.12, -0.02)                      | ( 0.12, 0.02)   |  |
| 4                                              | 2 | ( 0.00, -0.02) | ( 0.12, -0.03)                      | ( 0.12, 0.03)   |  |
| 4                                              | 3 | ( 0.00, -0.01) | ( 0.00, -0.01)                      | ( 0.00, 0.01)   |  |
| 4                                              | 4 | ( 0.00, -0.04) | ( 0.02, 0.00)                       | ( 0.02, -0.00)  |  |
| 4                                              | 5 | ( 0.00, 0.01)  | ( -0.01, 0.01)                      | ( -0.01, -0.01) |  |
| 5                                              | 0 | ( 0.00, -0.01) | ( -0.13, 0.03)                      | ( -0.13, -0.03) |  |
| 5                                              | 1 | ( 0.00, 0.13)  | ( -0.05, 0.16)                      | ( -0.05, -0.16) |  |
| 5                                              | 2 | ( 0.00, -0.00) | ( 0.02, -0.00)                      | ( 0.02, 0.00)   |  |
| 5                                              | 3 | ( 0.00, 0.00)  | ( 0.01, 0.00)                       | ( 0.01, -0.00)  |  |
| 5                                              | 4 | ( 0.00, 0.04)  | ( -0.05, -0.00)                     | ( -0.05, 0.00)  |  |
| 5                                              | 5 | ( 0.00, -0.01) | ( 0.01, -0.01)                      | ( 0.01, 0.01)   |  |

**Table S14.** Cartesian components of the spin-orbit matrix elements (absolute values in cm<sup>-1</sup>) between low-lying singlet and triplet states for *m*-THPC and TPAPs5

|                                       | <i>m</i> -THPC           | TPAPs5                   |
|---------------------------------------|--------------------------|--------------------------|
| $S_1 \hat{H}_{\text{soc}} T_1\rangle$ | $2.4 \times 10^{-1}$ (x) | $1.0 \times 10^{-2}$ (x) |
|                                       | $6.8 \times 10^{-2}$ (y) | $1.0 \times 10^{-2}$ (y) |
| $S_1 \hat{H}_{\text{soc}} T_2\rangle$ | $8.8 \times 10^{-3}$ (z) | $8.0 \times 10^{-2}$ (x) |
|                                       |                          | $8.0 \times 10^{-2}$ (y) |
| $S_1 \hat{H}_{\text{soc}} T_3\rangle$ | $1.4 \times 10^{-1}$ (x) | $1.0 \times 10^{-2}$ (z) |
|                                       | $2.2 \times 10^{-2}$ (y) | $6.1 \times 10^{-2}$ (x) |
| $S_1 \hat{H}_{\text{soc}} T_4\rangle$ | $2.2 \times 10^{-3}$ (z) | $6.1 \times 10^{-2}$ (y) |
|                                       |                          | $1.0 \times 10^{-2}$ (z) |
|                                       |                          | $1.2 \times 10^{-1}$ (x) |
|                                       |                          | $1.2 \times 10^{-1}$ (y) |
